# 1                   **Comparison of infection control strategies to reduce COVID-19** 2                   **outbreaks in homeless shelters in the United States**

3  
4  
5                   **Lloyd A.C. Chapman PhD<sup>1</sup>, Margot Kushel MD<sup>2</sup>, Sarah N. Cox MSPH<sup>3</sup>,**  
6                   **Ashley Scarborough MPH<sup>3</sup>, Caroline Cawley MPH<sup>4</sup>, Trang Nguyen MPH PhD<sup>3</sup>,**  
7                   **Isabel Rodriguez-Barraquer MD PhD<sup>1</sup>, Bryan Greenhouse MD<sup>1</sup>,**  
8                   **Elizabeth Imbert MD MPH<sup>5</sup>, and Nathan C. Lo MD PhD<sup>1</sup>**  
9

10                   <sup>1</sup>Department of Medicine, University of California, San Francisco, San Francisco, CA, USA

11                   <sup>2</sup>Center for Vulnerable Populations, Zuckerberg San Francisco General Hospital and Trauma  
12                   Center, University of California, San Francisco, San Francisco, CA, USA

13                   <sup>3</sup>San Francisco Department of Public Health, San Francisco, CA, USA

14                   <sup>4</sup>Department of Emergency Medicine, University of California, San Francisco, San Francisco,  
15                   CA, USA

16                   <sup>5</sup>Division of HIV, Infectious Diseases, and Global Medicine, University of California, San  
17                   Francisco, San Francisco, CA, USA  
18

19                   **Running title:** COVID-19 outbreaks in homeless shelters

20                   **Abstract Word Count:** 250/250

21                   **Main Text Word Count:** 3,003/3,000

22                   **Figures:** 3

23                   **Tables:** 2

24  
25                   **Keywords:** COVID-19, homelessness, shelters, infection control, outbreaks  
26

## 27                   **Correspondence:**

28                   Lloyd A.C. Chapman, PhD and Nathan C. Lo, MD PhD

29                   University of California, San Francisco

30                   Department of Medicine

31                   San Francisco, CA, USA 94110  
32

33                   **Conflicts of Interest:** The authors declare no conflicts of interest.  
34

## 35                   **Email:**

36                   Dr Lloyd A.C. Chapman (Lloyd.Chapman@ucsf.edu)

37                   Dr Nathan C. Lo (Nathan.Lo@ucsf.edu)  
38

39                   **Summary:** Combining symptom-screening, twice-weekly PCR testing and universal masking is  
40                   unlikely to prevent COVID-19 outbreaks in high-risk congregate homeless shelters and settings  
41                   with high community incidence, but may be sufficient in lower-risk settings. Alternative housing  
42                   arrangements are needed in high-risk settings.

43 **Abstract**

44 **Background:** Multiple COVID-19 outbreaks have occurred in homeless shelters across the US,  
45 highlighting an urgent need to identify the most effective infection control strategy to prevent  
46 future outbreaks.

47  
48 **Methods:** We developed a microsimulation model of SARS-CoV-2 transmission in a homeless  
49 shelter and calibrated it to data from cross-sectional polymerase-chain-reaction (PCR) surveys  
50 conducted during COVID-19 outbreaks in five shelters in three US cities from March 28 to April  
51 10, 2020. We estimated the probability of averting a COVID-19 outbreak in a representative  
52 homeless shelter of 250 residents and 50 staff over 30 days under different infection control  
53 strategies, including daily symptom-based screening, twice-weekly PCR testing and universal  
54 mask wearing.

55  
56 **Results:** Basic reproduction number ( $R_0$ ) estimates for the observed outbreaks ranged from 2.9  
57 to 6.2. The probability of averting an outbreak diminished with higher transmissibility ( $R_0$ )  
58 within the simulated shelter and increasing incidence in the local community. With moderate  
59 community incidence (~30 confirmed cases/1,000,000 people/day), the estimated probabilities of  
60 averting an outbreak in a low-risk ( $R_0=1.5$ ), moderate-risk ( $R_0=2.9$ ), and high-risk ( $R_0=6.2$ )  
61 shelter were: 0.33, 0.11 and 0.03 for daily symptom-based screening; 0.52, 0.27, and 0.04 for  
62 twice-weekly PCR testing; 0.47, 0.20 and 0.06 for universal masking; and 0.68, 0.40 and 0.08 for  
63 these strategies combined.

64

65    **Conclusions:** In high-risk homeless shelter environments and locations with high community  
66    incidence of COVID-19, even intensive infection control strategies are unlikely to prevent  
67    outbreaks, suggesting a need for non-congregate housing arrangements for people experiencing  
68    homelessness. In lower-risk environments, combined interventions should be adopted to reduce  
69    outbreak risk.  
70

## 71 **Introduction**

72 The COVID-19 pandemic caused by infection with severe acute respiratory syndrome  
73 coronavirus 2 (SARS-CoV-2) poses great risk to people experiencing homelessness. Across the  
74 US, the estimated 568,000 people who experience homelessness nightly [1] are likely to suffer a  
75 disproportionate disease burden and need for hospitalization [2,3]. People experiencing  
76 homelessness are on average older and have a high prevalence of comorbidities that are risk  
77 factors for severe COVID-19 [2]. Multiple outbreaks in homeless shelters have occurred in  
78 several cities including San Francisco, Boston, Seattle and Atlanta with attack rates of up to 67%  
79 [4–7]. Homeless shelters have had to remain open in most cities despite high incidence of  
80 infection in the community, concern about the risk of further outbreaks, and uncertainty over the  
81 effectiveness of different infection control strategies. There is an immediate need to identify the  
82 best infection control strategy to reduce the risk of outbreaks and assess the safety of continuing  
83 to operate congregate shelters where transmission in the community is high.

84  
85 The role of shelters and associated infection control practices in transmission of COVID-19  
86 among people experiencing homelessness is still poorly understood. Given current understanding  
87 that SARS-CoV-2 virus is transmitted predominantly through respiratory droplets, with some  
88 airborne and fomite transmission [8], there is a need to consider policies to limit transmission  
89 within high-density congregate living environments. Different infection control strategies are  
90 currently recommended based on the level of transmission in the external community [9]. These  
91 include routine symptom screening, polymerase chain reaction (PCR) testing, universal mask  
92 wearing, and relocation of individuals at high risk of severe disease to non-congregate settings  
93 [10]. There is limited evidence on the effectiveness of strategies to reduce transmission in

94 congregate settings, and thus further research is urgently needed to guide city-level policy across  
95 the US.

96  
97 The goal of this study is to identify the most effective infection control strategy to slow the  
98 spread of COVID-19 among people experiencing homelessness who reside in shelters. We  
99 address this pressing question by estimating comparative health outcomes of key infection  
100 control strategies using a simulation model calibrated to data on homeless shelter outbreaks.

101

## 102 **Methods**

### 103 Microsimulation model

104 We developed an individual-level stochastic susceptible-exposed-infectious-recovered (SEIR)  
105 model [11] to simulate transmission of SARS-CoV-2 in a congregate shelter population  
106 (Supplementary Figure 1). The model defines individuals as susceptible, exposed, infectious, or  
107 immune to SARS-CoV-2 (Supplementary Table 1). We constructed the model to include  
108 important aspects of the natural history of COVID-19, including sub-clinical infection, pre-  
109 symptomatic transmission, and age-specific differences in risk of severe symptoms. In the  
110 model, susceptible individuals become infected with SARS-CoV-2 at a rate proportional to the  
111 prevalence of infectious individuals inside the shelter and their infectiousness (assuming  
112 homogeneous mixing), plus a static force of infection based on the background infection  
113 incidence in the community outside the shelter. Upon infection, individuals enter a latent  
114 infection stage in which they incubate the virus but are not infectious. They then progress to  
115 become infectious and contribute to ongoing transmission. An age-dependent fraction of infected  
116 individuals develop clinical symptoms with associated risk of hospitalization and death

117 (Supplementary Table 2), while the remainder have sub-clinical infection. Individuals who  
118 recover from infection are assumed to remain immune.

119

## 120 Data

121 The model was calibrated using aggregate data from PCR testing conducted during COVID-19  
122 outbreaks in five shelters in three US cities – San Francisco (n=1), Boston (n=1) and Seattle  
123 (n=3) [4,6,7] – from March 28–April 10, 2020. We obtained de-identified individual-level data  
124 from the outbreak in the San Francisco shelter (see Supplementary Material and Supplementary  
125 Table 3 for details), which is fully described elsewhere [5]. As of April 10, 2020, a total of 89  
126 individuals (84 residents, 5 staff) of 175 tested (130 residents, 45 staff) in the shelter were PCR-  
127 positive. We obtained aggregate data from the outbreaks in the Boston and Seattle shelters,  
128 where identified COVID-19 cases triggered mass testing events [4,6,7]. In the Boston shelter,  
129 147 of 408 residents and 15 of 50 staff were PCR-positive during testing conducted April 2–3,  
130 2020. The numbers of residents and staff tested and positive in the three Seattle shelters (shelters  
131 A, B and C) at two testing events conducted March 30–April 1 and April 7–8, 2020 are given in  
132 Supplementary Table 4.

133

## 134 Model calibration

135 We calibrated the model to the aggregate numbers of individuals PCR-positive out of those  
136 tested in each shelter (daily data for the San Francisco shelter, cross-sectional for the Seattle and  
137 Boston shelters) using approximate Bayesian computation techniques (see Supplementary  
138 Material). We fitted the following parameters: (i) the basic reproduction number  $R_0$  (the average  
139 number of secondary infections generated by the average infectious individual in an entirely

140 susceptible shelter population), (ii) the number of latently infected individuals who initially  
141 entered the shelter  $E_0$ , and (iii) the number of days before the first case was identified that these  
142 individuals entered the shelter  $D$  (Table 1). The remaining parameters were sourced from  
143 literature on natural history and epidemiology of SARS-CoV-2 (Table 1 and Supplementary  
144 Table 5).

145

#### 146 Infection control strategies

147 We simulated six infection control strategies (Supplementary Table 6). 1) *Daily symptom-based*  
148 *screening*: daily screening of all individuals in the shelter involving a temperature and symptom  
149 survey. Individuals who screened positive were PCR tested, with 80% compliance, and isolated  
150 for 1 day pending the test result; if negative, they returned to the population. We used published  
151 data on the sensitivity of symptom-based screening with time since infection [12], which  
152 suggests that close to 100% of symptomatic cases (a subset of all true cases) would eventually be  
153 detected under repeated daily screening based on the definition of being symptomatic, even with  
154 low sensitivity of symptom screening on any one occasion (here assumed to be 40% to give a  
155 98% probability of detection after 8 days of daily symptom screening). Despite reports of low  
156 specificity of symptom screening [13,14], a high specificity of 90% was assumed to prevent  
157 unrealistic levels of PCR testing and isolation of symptom-positive individuals awaiting test  
158 results. We assumed a minimum of 3 days between repeat PCR tests for the same individual  
159 based on typical clinical practice and test turnaround times. 2) *Routine PCR testing*: twice-  
160 weekly PCR testing of residents and staff based on prior literature analyzing reduction in  
161 transmission and cost-effectiveness under different testing frequencies [15–17]. We assumed  
162 75% sensitivity and 100% specificity of PCR testing based on published literature [18–21], a

163 mean duration of detectable viral load (starting prior to development of symptoms) of 20 days  
164 (Supplementary Figure 3) [22–27], and 80% compliance with testing. We assumed test results  
165 were returned in 1 day, after which time individuals who tested PCR-positive were removed  
166 from the shelter population. 3) *Universal mask wearing*: wearing of surgical masks by all  
167 persons within the shelter. We assumed that surgical mask wearing reduced the amount of  
168 infectious SARS-CoV-2 material breathed into the air by infected individuals by 30% based on  
169 literature estimates from household studies assuming high compliance and recent experimental  
170 studies [28–33], and that 80% of individuals adhered to mask wearing [34–36]. 4) *Relocation of*  
171 *“high-risk” individuals*: moving high-risk individuals (defined as those  $\geq 60$  years and/or with  
172 co-morbidities) to single hotel rooms, modelled by replacing such individuals with lower-risk  
173 individuals. 5) *Routine PCR testing of staff only*: twice-weekly testing of staff only, assuming  
174 80% compliance. 6) *Combination strategy*: strategies 1–4 combined. Daily symptom screening  
175 (strategy 1) was included in all strategies.

176

### 177 Prediction of impact of infection control strategies

178 For each intervention strategy we simulated transmission within a shelter of 250 residents and 50  
179 staff (based on an average shelter size) over 30 days starting with one latently infected individual  
180 1000 times (to account for stochastic uncertainty). The time period was chosen to capture the  
181 trajectory of an outbreak and differential benefits of strategies. The primary outcome was the  
182 probability of averting an outbreak (defined as 3 or more infections originating within the shelter  
183 in any 14-day period [37,38]) under each strategy, with secondary outcomes of the proportional  
184 reductions in the total numbers of COVID-19 infections and clinical cases, and total numbers of  
185 hospitalizations, deaths and PCR tests used. Only individuals who tested positive were removed



186 from the shelter population. The initial population was chosen to have the same composition in  
187 terms of proportions in different risk groups (by age and co-morbidity status) as the San  
188 Francisco shelter. We estimated the probability of averting an outbreak under each intervention  
189 strategy (compared with no interventions) for each calibrated  $R_0$  value for a range of different  
190 background infection rates estimated from recent incidence of confirmed cases in Seattle, Boston  
191 and San Francisco (see Supplementary Material for details). To account for potential upward bias  
192 in the estimated  $R_0$  range due to fitting to data from shelters with high attack rates, we performed  
193 the same simulations for a shelter environment with a low  $R_0$  of 1.5. Analyzed data and model  
194 code are available at [https://github.com/LloydChapman/COVID\\_homeless\\_modelling](https://github.com/LloydChapman/COVID_homeless_modelling). This  
195 study was considered exempt non-human subject research based on use of de-identified  
196 secondary data by the University of California, San Francisco Institutional Review Board.

197

### 198 *Sensitivity analysis*

199 We conducted a multi-way sensitivity analysis to assess the impact of uncertainty in key natural  
200 history and intervention parameters (relative infectiousness of subclinical infection and the early  
201 infectious stage, sensitivities and specificities of symptom screening and PCR tests, testing and  
202 masking compliances, and mask effectiveness) on the results (Table 1). We explored the impact  
203 of PCR testing frequency on the probability of averting an outbreak by varying the testing  
204 frequency in strategy 2 from daily to monthly.

205

## 206 **Results**

### 207 *Model calibration*

208 The model reproduced the numbers of PCR-positive individuals in the cross-sectional surveys in  
209 the Seattle and Boston shelters (Supplementary Figure 4) and the observed numbers of PCR-  
210 positive individuals and symptomatic cases over time for the outbreak in the San Francisco  
211 shelter (Supplementary Figures 4 and 5). The estimated  $R_0$  values ranged from 2.9 (95% CI 1.1–  
212 6.7) for Seattle shelter B to 6.2 (95% CI 4.0–7.9) for the San Francisco shelter (Supplementary  
213 Table 7), with corresponding estimated cumulative infection incidences at the end of the testing  
214 period of 14% (95% CI 1–41%) and 83% (95% CI 72–92%) (Supplementary Table 8). The  
215 median estimated number of infections initially introduced was 3 for all shelters (95% CI 1–5).  
216 The estimated date of introduction of infection ranged from 10 days (95% CI 7–14 days) before  
217 the first case was identified for Seattle shelter B to 21 days (95% CI 17–26 days) before for San  
218 Francisco.

219

### 220 Impact of infection control strategies

221 Table 2 shows the projected impact of the six infection control strategies considered, for  
222 different transmission environments. Daily symptom screening performed poorly across different  
223 transmissibilities (probability of averting an outbreak = 0.03 for San Francisco  $R_0 = 6.2$ , and  
224 probability = 0.33 for  $R_0 = 1.5$ ). Relocating individuals at high-risk of clinical symptoms  
225 combined with symptom screening performed similarly to symptom screening alone (probability  
226 of averting an outbreak = 0.03–0.33 for  $R_0 = 6.2$ –1.5). Twice-weekly PCR testing of staff  
227 provided some additional benefit over daily symptom screening at lower transmissibilities  
228 (probability of averting an outbreak = 0.03–0.40 for  $R_0 = 6.2$ –1.5). Universal masking and  
229 twice-weekly PCR testing of all individuals yielded higher probabilities of averting an outbreak  
230 of 0.06–0.47 and 0.04–0.52 for  $R_0 = 6.2$ –1.5. The combination strategy involving daily

231 symptom screening, twice-weekly PCR testing of all individuals, universal masking, and  
232 removal of high-risk individuals gave the highest probability of averting an outbreak (0.08–0.68  
233 for  $R_0 = 6.2$ –1.5).

234  
235 The probability of averting an outbreak under each intervention strategy decreased with  
236 increasing transmission potential ( $R_0$ ) inside the shelter and with increasing infection incidence  
237 in the community outside the shelter (Figure 1). Even under the combination strategy, the  
238 probability of averting an outbreak in an average-transmission-potential shelter ( $R_0 = 2.9$ )  
239 decreased from 0.58 to 0.07 as the background infection rate increased from 0 to 439 cases per 1  
240 million person-days (the estimated background infection rate in San Francisco between June 27  
241 and July 10, 2020).

242  
243 The relative reduction in infection incidence under the different infection control strategies  
244 followed the same pattern as the probability of averting an outbreak (Supplementary Table 10  
245 and Figure 2).

246  
247 PCR test requirements were approximately three times higher (at an average of 6.6 tests per  
248 person per month) under twice-weekly PCR testing of all individuals than when only testing  
249 individuals identified as symptomatic in daily symptom screening (2.0 tests/person/month), and  
250 approximately two times higher than when only testing staff twice-a-week (2.8  
251 tests/person/month) (Supplementary Table 11).

252  
253 Sensitivity analysis

254 The probability of averting an outbreak was most sensitive to uncertainty in mask effectiveness  
255 and relative infectiousness of the early infectious stage, followed by PCR sensitivity and  
256 masking and testing compliances (Supplement Figure 9). Decreasing the frequency of PCR  
257 testing from daily to monthly decreased the probability of averting an outbreak for  $R_0 = 1.5, 2.9$   
258 and  $3.9$  from  $0.70$  to  $0.35$ ,  $0.27$  to  $0.12$ , and  $0.23$  to  $0.08$  respectively, but had little impact on the  
259 already low probability of averting an outbreak for  $R_0 = 6.2$  (Figure 3).

260

## 261 **Discussion**

262 Several outbreaks of COVID-19 with high attack rates have occurred in homeless shelters across  
263 the US, and there remains uncertainty over the best infection control strategies to reduce  
264 outbreak risk in shelters. In this study, we applied a simulation analysis to identify infection  
265 control strategies to prevent future outbreaks. We found that in high-risk shelters that are unable  
266 to maximize basic infection control practices that sufficiently reduce the transmissibility of  
267 SARS-CoV-2 (e.g. social distancing, reduced living density), no additional infection control  
268 strategy is likely to prevent outbreaks. In contrast, in lower-risk shelters with low background  
269 community incidence, the implementation of strategies such as symptom screening, routine PCR  
270 testing, and masking would help reduce outbreak risk.

271

272 We found a wide range of transmissibility of SARS-CoV-2 based on observed outbreaks in  
273 homeless shelters, which greatly affects intervention impact. Basic reproduction number ( $R_0$ )  
274 estimates ranged from  $2.9$  to  $6.2$ , which is at the high end of estimates in the literature [39–42].  
275 This likely reflects a high degree of heterogeneity in infectiousness between individuals [41,43–  
276 46] and a highly conducive environment for transmission within these shelters due to lack of

277 existing infection control practices and high living density. Our  $R_0$  estimates are also likely not  
278 entirely representative of general transmission potential in shelters as non-outbreaks and smaller  
279 outbreaks may go undetected or unreported, and some shelters have reported only low numbers  
280 of infections [4,47]. For these  $R_0$  values and current background infection rates, we found that  
281 the infection control strategies considered are unlikely to prevent outbreaks (probability < 40%),  
282 even when combined. Nevertheless, they do reduce incidence of infection and clinical disease  
283 and slow the growth of the outbreak (Figure 2).

284  
285 In a lower transmissibility setting, with  $R_0 = 1.5$ , e.g. where staff and clients are able to socially  
286 distance, the considered intervention strategies are more likely to prevent outbreaks (probability  
287 up to nearly 70% under combined interventions, for a moderate background infection rate  
288 equivalent to that in Boston in early July of 122/1,000,000/day).

289  
290 A key remaining issue is identifying the characteristics that distinguish low-risk shelters that can  
291 be safely operated with implementation of infection control strategies. Data is limited, but  
292 available evidence suggests that social distancing and reductions in super-spreading are likely to  
293 be key factors [41,43,48–50]. Strategies that may achieve these goals include reducing living  
294 density, spacing bedding, reducing communal activities, and adopting staffing models that limit  
295 social contacts.

296  
297 The fact that intervention impact and the probability of averting an outbreak decrease  
298 significantly with increasing background infection rate in the community (Figure 1) suggests a  
299 need for alternative housing arrangements for people experiencing homelessness in locations in

300 which community incidence is moderate to high – 100–500 infections/1,000,000/day, equivalent  
301 to 25–125 confirmed cases/1,000,000/day (i.e. current San Francisco incidence) assuming four-  
302 fold underreporting (see Supplementary Material). In lower background incidence settings,  
303 combined daily symptom-based screening, twice-weekly PCR testing, universal masking and  
304 relocation of high-risk individuals to non-congregate settings would reduce outbreak risk, and  
305 limit incidence of infection and severe disease if outbreaks do occur.

306  
307 Each infection control strategy is limited in some aspect [22,51–55]. Symptom-based screening  
308 has very low sensitivity to detect infections early in the clinical course (when people are most  
309 infectious), and poor specificity [12–14,56]. The impact of routine PCR testing is limited by  
310 imperfect PCR sensitivity (~75%), especially early in the infection course [19], as well as need  
311 for frequent testing and missing onset of infectiousness between testing periods. Other analyses  
312 support our finding that testing less than once or twice weekly leaves a high risk of outbreaks  
313 (e.g. testing once every two weeks gives a 30% lower probability of averting an outbreak than  
314 twice-weekly testing, Figure 3) [15–17]. However, once- or twice-weekly testing may be  
315 financially and logistically infeasible. Similarly, relocation of high-risk persons to independent  
316 housing is resource intensive. Frequent testing and universal masking also suffer issues with  
317 adherence, which constrains their effectiveness.

318  
319 This study has a number of limitations. Due to limited data availability, we only calibrated the  
320 model to a small number of shelter outbreaks, the  $R_0$  estimates for which are likely to be higher  
321 than for the average shelter due to larger outbreaks being more likely to be reported. The cross-  
322 sectional aggregate nature of the majority of the data also led to wide uncertainty intervals

323 around the fitted parameters, without independent identifiability between them (Supplementary  
324 Figure 10). Our estimate of the impact of masking is highly sensitive to the assumed  
325 effectiveness of masking, which has mixed evidence [28,29,31]. Many uncertainties in the  
326 biology of SARS-CoV-2 transmission remain, particularly regarding differential infectiousness  
327 over time and by severity of illness, and the relationship of PCR positivity and infectiousness, for  
328 which we had to make assumptions based on currently available evidence (see Supplementary  
329 Material) [22,57,58].

330  
331 This study defines conditions that would support safely operating homeless shelters with lower  
332 risk of COVID-19 outbreaks and estimates the impact of various interventions on outbreak risk.  
333 Our findings demonstrate the need for combined interventions (symptom-based screening, PCR  
334 testing, and masking) and regular testing to protect persons experiencing homelessness from  
335 COVID-19, while highlighting the limitations of these interventions in preventing outbreaks.  
336

337 Funding:

338 This work was supported by the University of California, San Francisco and the UCSF Benioff  
339 Homelessness and Housing Initiative.

340

341 Acknowledgements:

342 We sincerely appreciate the hard work and public health efforts of all those involved in the  
343 collection of the data used in this article. LACC would like to thank Renata Retkute, Amanda  
344 Minter, Simon Spencer and TJ McKinley for helpful discussions regarding Approximate  
345 Bayesian Computation.

346

347 Disclosures:

348 The authors declare no conflicts of interest or disclosures. NCL has received funding from the  
349 World Health Organization for unrelated work.

350

351 Author Contributions:

352 Conceptualization: NCL, LACC

353 Data Curation: LACC, SNC, AS, CC, TN, EI

354 Formal Analysis: LACC, NCL

355 Funding Acquisition: NCL, MK

356 Investigation: LACC, NCL

357 Methodology: LACC, NCL

358 Project Administration: NCL

359 Resources: NCL

360 Software: LACC

361 Supervision: NCL, MK

362 Visualization: LACC, NCL

363 Writing – Original Draft Preparation: LACC, NCL

364 Writing – Review & Editing: All authors

365 Drs. Lloyd A.C. Chapman and Nathan C. Lo had full access to all of the data in the study and  
366 take responsibility for the integrity of the data and the accuracy of the data analysis.

367



## 368 **References**

- 369 1. Henry M, Watt R, Mahathey A, et al. The 2019 Annual Homeless Assessment Report  
370 (AHAR) to Congress. Washington, DC: 2020.
- 371 2. Perri M, Dosani N, Hwang SW. COVID-19 and people experiencing homelessness:  
372 challenges and mitigation strategies. *CMAJ* **2020**; 192:E716–E719.
- 373 3. Culhane D, Treglia D, Steif K, Kuhn R, Byrne T. Estimated Emergency and  
374 Observational/Quarantine Capacity Need for the US Homeless Population Related to  
375 COVID-19 Exposure by County; Projected Hospitalizations, Intensive Care Units and  
376 Mortality. 2020. Available at: [https://works.bepress.com/dennis\\_culhane/237/](https://works.bepress.com/dennis_culhane/237/).
- 377 4. Mosites E, Parker EM, N Clarke KE, et al. Assessment of SARS-CoV-2 Infection  
378 Prevalence in Homeless Shelters — Four U.S. Cities, March 27–April 15, 2020. **2019**; 69.  
379 Available at: <https://www.medrxiv.org/content/10.1101/2020.04.12.20059618v1>.
- 380 5. Imbert E, Kinley PM, Scarborough A, et al. Coronavirus Disease 2019 (COVID-19)  
381 Outbreak in a San Francisco Homeless Shelter. *Clin Infect Dis* **2020**; Available at:  
382 <https://academic.oup.com/cid/advance-article/doi/10.1093/cid/ciaa1071/5879965>.  
383 Accessed 21 August 2020.
- 384 6. Baggett TP, Keyes H, Sporn N, Gaeta JM. Prevalence of SARS-CoV-2 Infection in  
385 Residents of a Large Homeless Shelter in Boston. *JAMA - J Am Med Assoc* **2020**;  
386 323:2191–2192.
- 387 7. Tobolowsky FA, Gonzales E. COVID-19 Outbreak Among Three Affiliated Homeless  
388 Service Sites — King County, Washington, 2020. *Morb Mortal Wkly Rep* **2020**; 69:523–  
389 526.
- 390 8. World Health Organization. Transmission of SARS-CoV-2: implications for infection  
391 prevention precautions. 2020. Available at:  
392 [https://www.who.int/publications/i/item/modes-of-transmission-of-virus-causing-covid-](https://www.who.int/publications/i/item/modes-of-transmission-of-virus-causing-covid-19-implications-for-ipc-precaution-recommendations)  
393 [19-implications-for-ipc-precaution-recommendations](https://www.who.int/publications/i/item/modes-of-transmission-of-virus-causing-covid-19-implications-for-ipc-precaution-recommendations). Accessed 11 August 2020.
- 394 9. Centers for Disease Control. Interim Considerations for Health Departments for SARS-  
395 CoV-2 Testing in Homeless Shelters and Encampments. 2020. Available at:  
396 <https://www.cdc.gov/coronavirus/2019-ncov/community/homeless-shelters/testing.html>.  
397 Accessed 11 August 2020.
- 398 10. Centers for Disease Control. Investigating and responding to COVID-19 cases at homeless  
399 service provider sites. 2020. Available at: [https://www.cdc.gov/coronavirus/2019-](https://www.cdc.gov/coronavirus/2019-ncov/php/investigating-cases-homeless-shelters.html)  
400 [ncov/php/investigating-cases-homeless-shelters.html](https://www.cdc.gov/coronavirus/2019-ncov/php/investigating-cases-homeless-shelters.html). Accessed 11 August 2020.
- 401 11. Bertozzi AL, Franco E, Mohler G, Short MB, Sledge D. The challenges of modeling and  
402 forecasting the spread of COVID-19. *Proc Natl Acad Sci* **2020**; :202006520.
- 403 12. Gostic KM, Gomez ACR, Mummah RO, Kucharski AJ, Lloyd-Smith JO. Estimated  
404 effectiveness of symptom and risk screening to prevent the spread of COVID-19. *Elife*  
405 **2020**; 9:1–18.
- 406 13. Roxby AC, Greninger AL, Hatfield KM, et al. Outbreak Investigation of COVID-19  
407 among Residents and Staff of an Independent and Assisted Living Community for Older  
408 Adults in Seattle, Washington. *JAMA Intern Med* **2020**; 98104.
- 409 14. Kimball A, Hatfield KM, Arons M, et al. Asymptomatic and Presymptomatic SARS-CoV-  
410 2 Infections in Residents of a Long-Term Care Skilled Nursing Facility — King County,  
411 Washington, March 2020. *Morb Mortal Wkly Rep* **2020**; 69:377–381.
- 412 15. Larremore DB, Wilder B, Lester E, et al. Test sensitivity is secondary to frequency and  
413 turnaround time for COVID-19 surveillance. *medRxiv* **2020**; :2020.06.22.20136309.

- 414 Available at:  
415 <https://www.medrxiv.org/content/10.1101/2020.06.22.20136309v2%0Ahttps://www.medrxiv.org/content/10.1101/2020.06.22.20136309v2.abstract>.  
416
- 417 16. Paltiel AD, Zheng A, Walensky RP. Assessment of SARS-CoV-2 Screening Strategies to  
418 Permit the Safe Reopening of College Campuses in the United States. *JAMA Netw Open*  
419 **2020**; 3:e2016818. Available at: <http://www.ncbi.nlm.nih.gov/pubmed/32735339>.
  - 420 17. Chin ET, Huynh BQ, Murrill M, Basu S, Lo NC. Frequency of routine testing for COVID-  
421 19 in high-risk environments to reduce workplace outbreaks. *medRxiv* **2020**;  
422 :2020.04.30.20087015. Available at:  
423 <http://medrxiv.org/content/early/2020/06/22/2020.04.30.20087015.abstract>.
  - 424 18. Arevalo-Rodriguez I, Buitrago-Garcia D, Simancas-Racines D, et al. False-Negative  
425 Results of Initial RT-PCR Assays for Covid-19: a Systematic Review. **2020**; :1–26.
  - 426 19. Kucirka LM, Lauer SA, Laeyendecker O, Boon D, Lessler J. Variation in False-Negative  
427 Rate of Reverse Transcriptase Polymerase Chain Reaction–Based SARS-CoV-2 Tests by  
428 Time Since Exposure. *Ann Intern Med* **2020**;
  - 429 20. Watson J, Whiting PF, Brush JE. Interpreting a covid-19 test result. *BMJ* **2020**; 369:1–7.  
430 Available at: <http://dx.doi.org/doi:10.1136/bmj.m1808>.
  - 431 21. Padhye NS. Reconstructed diagnostic sensitivity and specificity of the RT-PCR test for  
432 COVID-19. *medRxiv* **2020**; 19:2020.04.24.20078949. Available at:  
433 <http://medrxiv.org/lookup/doi/10.1101/2020.04.24.20078949>.
  - 434 22. He X, Lau EHY, Wu P, et al. Temporal dynamics in viral shedding and transmissibility of  
435 COVID-19. *Nat Med* **2020**; 26:672–675.
  - 436 23. Wölfel R, Corman VM, Guggemos W, et al. Virological assessment of hospitalized  
437 patients with COVID-2019. *Nature* **2020**; 581:465–469.
  - 438 24. To KKW, Tsang OTY, Leung WS, et al. Temporal profiles of viral load in posterior  
439 oropharyngeal saliva samples and serum antibody responses during infection by SARS-  
440 CoV-2: an observational cohort study. *Lancet Infect Dis* **2020**; 20:565–574. Available at:  
441 [http://dx.doi.org/10.1016/S1473-3099\(20\)30196-1](http://dx.doi.org/10.1016/S1473-3099(20)30196-1).
  - 442 25. Zhou F, Yu T, Du R, et al. Clinical course and risk factors for mortality of adult inpatients  
443 with COVID-19 in Wuhan, China: a retrospective cohort study. *Lancet* **2020**; 395:1054–  
444 1062. Available at: [http://dx.doi.org/10.1016/S0140-6736\(20\)30566-3](http://dx.doi.org/10.1016/S0140-6736(20)30566-3).
  - 445 26. Xiao AT, Tong YX, Gao C, Zhu L, Zhang YJ, Zhang S. Dynamic profile of RT-PCR  
446 findings from 301 COVID-19 patients in Wuhan, China: A descriptive study. *J Clin Virol*  
447 **2020**; 127:0–6.
  - 448 27. Zou L, Ruan F, Huang M, et al. SARS-CoV-2 viral load in upper respiratory specimens of  
449 infected patients. *N Engl J Med* **2020**; 382:1177–1179.
  - 450 28. Leung NHL, Chu DKW, Shiu EYC, et al. Respiratory virus shedding in exhaled breath  
451 and efficacy of face masks. *Nat Med* **2020**; 26:676–680. Available at:  
452 <http://dx.doi.org/10.1038/s41591-020-0843-2>.
  - 453 29. MacIntyre CR, Chughtai AA. Facemasks for the prevention of infection in healthcare and  
454 community settings. *BMJ* **2015**; 350:1–12.
  - 455 30. MacIntyre CR, Chughtai AA. A rapid systematic review of the efficacy of face masks and  
456 respirators against coronaviruses and other respiratory transmissible viruses for the  
457 community, healthcare workers and sick patients. *Int J Nurs Stud* **2020**; 108:0–5.
  - 458 31. Brainard JS, Jones N, Lake I, Hooper L, Hunter P. Facemasks and similar barriers to  
459 prevent respiratory illness such as COVID-19: A rapid systematic review. **2020**;

- 460 32. Chan JF-WW, Yuan S, Zhang AJ, et al. Surgical mask partition reduces the risk of non-  
461 contact transmission in a golden Syrian hamster model for Coronavirus Disease 2019  
462 (COVID-19). *Clin Infect Dis* **2020**; Available at: [https://academic.oup.com/cid/advance-](https://academic.oup.com/cid/advance-article/doi/10.1093/cid/ciaa644/5848814)  
463 [article/doi/10.1093/cid/ciaa644/5848814](https://academic.oup.com/cid/advance-article/doi/10.1093/cid/ciaa644/5848814). Accessed 11 August 2020.
- 464 33. Mueller A, Eden M, Oakes J, Bellini C, Fernandez L. Quantitative Method for  
465 Comparative Assessment of Particle Removal Efficiency of Fabric Masks as Alternatives  
466 to Standard Surgical Masks for PPE. *Matter* **2020**; Available at:  
467 <https://doi.org/10.1016/j.matt.2020.07.006>.
- 468 34. Axios, Ipsos. Axios/Ipsos Poll Wave 14. **2020**; Available at: [https://www.ipsos.com/en-](https://www.ipsos.com/en-us/news-polls/axios-ipsos-coronavirus-index)  
469 [us/news-polls/axios-ipsos-coronavirus-index](https://www.ipsos.com/en-us/news-polls/axios-ipsos-coronavirus-index).
- 470 35. Betsch C, Korn L, Sprengholz P, et al. Social and behavioral consequences of mask  
471 policies during the COVID-19 pandemic. *Proc Natl Acad Sci U S A* **2020**; 117:21851–  
472 21853.
- 473 36. Haischer MH, Beilfuss R, Rose Hart M, et al. Who is wearing a mask? Gender-, age-, and  
474 location-related differences during the COVID-19 pandemic. *medRxiv* **2020**;  
475 :2020.07.13.20152736. Available at: <https://doi.org/10.1101/2020.07.13.20152736>.
- 476 37. Managing Investigations During an Outbreak | CDC. Available at:  
477 [https://www.cdc.gov/coronavirus/2019-ncov/php/contact-tracing/contact-tracing-](https://www.cdc.gov/coronavirus/2019-ncov/php/contact-tracing/contact-tracing-plan/outbreaks.html)  
478 [plan/outbreaks.html](https://www.cdc.gov/coronavirus/2019-ncov/php/contact-tracing/contact-tracing-plan/outbreaks.html). Accessed 11 August 2020.
- 479 38. Patel M, Lee AD, Clemmons NS, et al. National Update on Measles Cases and Outbreaks  
480 — United States, January 1–October 1, 2019. Available at:  
481 <https://www.who.int/immunization/policy/>.
- 482 39. Liu Y, Gayle AA, Wilder-Smith A, Rocklöv J. The reproductive number of COVID-19 is  
483 higher compared to SARS coronavirus. *J Travel Med* **2020**; 27:1–4.
- 484 40. Davies NG, Kucharski AJ, Eggo RM, et al. Effects of non-pharmaceutical interventions  
485 on COVID-19 cases, deaths, and demand for hospital services in the UK: a modelling  
486 study. *Lancet Public Heal* **2020**; :e375–e385.
- 487 41. Endo A, Abbott S, Kucharski AJ, Funk S. Estimating the overdispersion in COVID-19  
488 transmission using outbreak sizes outside China. **2020**; :1–13.
- 489 42. MIDAS Network. COVID-19 parameter estimates. Available at:  
490 [https://github.com/midas-network/COVID-](https://github.com/midas-network/COVID-19/tree/master/parameter_estimates/2019_novel_coronavirus)  
491 [19/tree/master/parameter\\_estimates/2019\\_novel\\_coronavirus](https://github.com/midas-network/COVID-19/tree/master/parameter_estimates/2019_novel_coronavirus). Accessed 11 August 2020.
- 492 43. Lau MS, Grenfell B, Nelson K, Lopman B. Characterizing super-spreading events and  
493 age-specific infectivity of COVID-19 transmission in Georgia, USA. *medRxiv* **2020**;  
494 :2020.06.20.20130476. Available at:  
495 <https://www.medrxiv.org/content/10.1101/2020.06.20.20130476v2%0Ahttps://www.medrxiv.org/content/10.1101/2020.06.20.20130476v2.abstract>.
- 496 44. Szablewski CM, Chang KT, Brown MM, et al. SARS-CoV-2 Transmission and Infection  
497 Among Attendees of an Overnight Camp - Georgia, June 2020. *Morb Mortal Wkly Rep*  
498 **2020**; 69:1023–1025. Available at: <http://www.ncbi.nlm.nih.gov/pubmed/32759921>.
- 499 45. James A, Eagle L, Phillips C, et al. High COVID-19 Attack Rate Among Attendees at  
500 Events at a Church — Arkansas, March 2020. *Morb Mortal Wkly Rep* **2020**; 69:632–635.
- 501 46. County S, Hamner L, Dubbel P, et al. High SARS-CoV-2 Attack Rate Following  
502 Exposure at a Choir Practice. *Morb Mortal Wkly Rep* **2020**; 69:606–610. Available at:  
503 <https://www.cdc.gov/mmwr/volumes/69/wr/mm6919e6.htm>.
- 504 47. City of San Diego. Operation Shelter to Home. 2020. Available at:  
505

- 506 <https://www.sandiego.gov/coronavirus/sheltertohome>. Accessed 21 August 2020.
- 507 48. Courtemanche C, Garuccio J, Le A, Pinkston J, Yelowitz A. Strong Social Distancing  
508 Measures In The United States Reduced The COVID-19 Growth Rate. *Health Aff* **2020**;  
509 39:1237–1246.
- 510 49. Prem K, Liu Y, Russell TW, et al. The effect of control strategies to reduce social mixing  
511 on outcomes of the COVID-19 epidemic in Wuhan, China: a modelling study. *Lancet*  
512 *Public Heal* **2020**; 5:e261–e270.
- 513 50. Jarvis CI, Van Zandvoort K, Gimma A, et al. Quantifying the impact of physical distance  
514 measures on the transmission of COVID-19 in the UK. *BMC Med* **2020**; 18:1–10.
- 515 51. Furukawa NW, Furukawa NW, Brooks JT, Sobel J. Evidence Supporting Transmission of  
516 Severe Acute Respiratory Syndrome Coronavirus 2 while Presymptomatic or  
517 Asymptomatic. *Emerg Infect Dis* **2020**; 26:E1–E6.
- 518 52. Arons MM, Hatfield KM, Reddy SC, et al. Presymptomatic SARS-CoV-2 infections and  
519 transmission in a skilled nursing facility. *N Engl J Med* **2020**; 382:2081–2090.
- 520 53. Tindale LC, Stockdale JE, Coombe M, et al. Evidence for transmission of COVID-19  
521 prior to symptom onset. *Elife* **2020**; 9:1–34.
- 522 54. Casey M, Griffin J, McAloon CG, et al. Estimating pre-symptomatic transmission of  
523 COVID-19: a secondary analysis using published data. *medRxiv* **2020**;  
524 :2020.05.08.20094870. Available at:  
525 <http://medrxiv.org/lookup/doi/10.1101/2020.05.08.20094870>.
- 526 55. Li R, Pei S, Chen B, et al. Substantial undocumented infection facilitates the rapid  
527 dissemination of novel coronavirus (SARS-CoV-2). *Science* (80- ) **2020**; 368:489–493.
- 528 56. Arima Y, Kutsuna S, Shimada T, et al. Severe Acute Respiratory Syndrome Coronavirus 2  
529 Infection among Returnees to Japan from Wuhan, China, 2020. *Emerg Infect Dis* **2020**;  
530 26:1596–1600. Available at: <https://doi.org/10.1056/NEJMc2001899>. Accessed 11 August  
531 2020.
- 532 57. Bullard J, Dust K, Funk D, et al. Predicting infectious SARS-CoV-2 from diagnostic  
533 samples. *Clin Infect Dis* **2020**; Available at: [https://academic.oup.com/cid/advance-](https://academic.oup.com/cid/advance-article/doi/10.1093/cid/ciaa638/5842165)  
534 [article/doi/10.1093/cid/ciaa638/5842165](https://academic.oup.com/cid/advance-article/doi/10.1093/cid/ciaa638/5842165). Accessed 11 August 2020.
- 535 58. Long QX, Tang XJ, Shi QL, et al. Clinical and immunological assessment of  
536 asymptomatic SARS-CoV-2 infections. *Nat Med* **2020**;
- 537 59. Chang D, Mo G, Yuan X, et al. Time Kinetics of Viral Clearance and Resolution of  
538 Symptoms in Novel Coronavirus Infection. *Am J Respir Crit Care Med* **2020**; 201:1150–  
539 1152.
- 540 60. Chen Y, Wang A, Yi B, et al. Epidemiological characteristics of infection in COVID-19  
541 close contacts in Ningbo city. *Chinese J Epidemiol* **2020**; 41:667–671.
- 542 61. Davies NG, Klepac P, Liu Y, Prem K, Jit M, Eggo RM. Age-dependent effects in the  
543 transmission and control of COVID-19 epidemics. *medRxiv* **2020**;
- 544 62. King County Department of Public Health. Daily COVID-19 outbreak summary - King  
545 County. 2020. Available at: [https://www.kingcounty.gov/depts/health/covid-19/data/daily-](https://www.kingcounty.gov/depts/health/covid-19/data/daily-summary.aspx)  
546 [summary.aspx](https://www.kingcounty.gov/depts/health/covid-19/data/daily-summary.aspx). Accessed 13 August 2020.
- 547 63. City of Boston. COVID-19 Case Tracker. 2020. Available at:  
548 [https://dashboard.cityofboston.gov/t/Guest\\_Access\\_Enabled/views/COVID-](https://dashboard.cityofboston.gov/t/Guest_Access_Enabled/views/COVID-19/Dashboard1?showAppBanner=false&:display_count=n&:showVizHome=n&:origin=viz_share_link&:isGuestRedirectFromVizportal=y&:embed=y)  
549 [19/Dashboard1?showAppBanner=false&:display\\_count=n&:showVizHome=n&:origin=](https://dashboard.cityofboston.gov/t/Guest_Access_Enabled/views/COVID-19/Dashboard1?showAppBanner=false&:display_count=n&:showVizHome=n&:origin=viz_share_link&:isGuestRedirectFromVizportal=y&:embed=y)  
550 [viz\\_share\\_link&:isGuestRedirectFromVizportal=y&:embed=y](https://dashboard.cityofboston.gov/t/Guest_Access_Enabled/views/COVID-19/Dashboard1?showAppBanner=false&:display_count=n&:showVizHome=n&:origin=viz_share_link&:isGuestRedirectFromVizportal=y&:embed=y). Accessed 13 August 2020.
- 551 64. San Francisco Department of Public Health. COVID-19 Cases Summarized by Date,

552           Transmission and Case Disposition - City and County of San Francisco. 2020. Available  
553           at: [https://data.sfgov.org/COVID-19/COVID-19-Cases-Summarized-by-Date-](https://data.sfgov.org/COVID-19/COVID-19-Cases-Summarized-by-Date-Transmission-and/tvq9-ec9w)  
554           Transmission-and/tvq9-ec9w. Accessed 13 August 2020.

555  
556

557 **Tables and Figures**

558

559 **Table 1. Microsimulation input parameters based on observed outbreak data from**  
 560 **homeless shelters in Seattle, Boston and San Francisco**

| Parameter                                                                                | Base case value                               | Range in sensitivity analysis* | References            |
|------------------------------------------------------------------------------------------|-----------------------------------------------|--------------------------------|-----------------------|
| <i>Natural history</i>                                                                   |                                               |                                |                       |
| Mean duration of latent infection period, days                                           | 3                                             | -                              | [22]                  |
| Mean duration of early infectious stage (subclinical/clinical), days                     | 2.3                                           | -                              | [22]                  |
| Mean duration of late infectious stage (subclinical/clinical), days                      | 8                                             | -                              | [22,23,57,59]         |
| Relative infectiousness of subclinical infection to clinical infection                   | 1                                             | 0.5–1                          | [55,58,60]            |
| Relative infectiousness of early infectious stage to late infectious stage               | 2                                             | 1–3                            | [22,54]               |
| Probability of developing clinical symptoms                                              | Age-dependent (see Supplementary Table 2)     | -                              | [61]                  |
| Background infection rate in community outside shelter, infections/1,000,000 person-days | Shelter-specific (see Supplementary Material) | 0–439                          | [62–64]               |
| Basic reproduction number, $R_0$                                                         | Variable                                      | 1.5–6.2                        | Estimated             |
| <i>Intervention</i>                                                                      |                                               |                                |                       |
| Symptom screening                                                                        |                                               |                                |                       |
| Sensitivity                                                                              | 0.4                                           | 0.3–0.5                        | Assumed based on [12] |
| Specificity                                                                              | 0.9                                           | 0.8–0.9                        | Assumed               |
| Compliance of symptomatic individuals with PCR testing, %                                | 80                                            | 50–100                         | Assumed               |
| PCR testing                                                                              |                                               |                                |                       |
| Sensitivity                                                                              | 0.75                                          | 0.6–0.9                        | [18–21]               |
| Specificity                                                                              | 1                                             | 0.95–1                         | [19,21]               |
| Frequency                                                                                | Twice weekly                                  | Daily–Monthly                  | [15–17]               |
| Compliance, %                                                                            | 80                                            | 50–100                         | Assumed               |
| Masks                                                                                    |                                               |                                |                       |
| Effectiveness (reduction in transmission)                                                | 30                                            | 10–50                          | [28–33]               |
| Compliance, %                                                                            | 80                                            | 50–100                         | Assumed               |

561 \* In the sensitivity analysis, each intervention strategy was simulated with all combinations of the minimum and  
 562 maximum values of the ranges for the indicated parameters to generate the uncertainty intervals around the  
 563 probability of averting an outbreak in Table 2.

564 See Supplementary Table 5 for complete list of all parameters used in model calibration and intervention

565 simulations.  
566

**Table 2. Probability of averting an outbreak\* over a 30-day period in a generalized homeless shelter† with simulated infection control strategies**

| Infection control strategy‡                       | Probability of averting an outbreak (UI)§ |                          |                         |                                |
|---------------------------------------------------|-------------------------------------------|--------------------------|-------------------------|--------------------------------|
|                                                   | $R_0 = 1.5$<br>(low-risk)                 | $R_0 = 2.9$<br>(Seattle) | $R_0 = 3.9$<br>(Boston) | $R_0 = 6.2$<br>(San Francisco) |
| 1) Symptom screening                              | 0.33 (0.22–0.61)                          | 0.11 (0.07–0.35)         | 0.07 (0.03–0.24)        | 0.03 (0.01–0.13)               |
| 2) Routine twice-weekly PCR testing               | 0.52 (0.38–0.81)                          | 0.27 (0.14–0.56)         | 0.18 (0.08–0.42)        | 0.04 (0.02–0.26)               |
| 3) Universal mask wearing                         | 0.47 (0.24–0.88)                          | 0.20 (0.08–0.64)         | 0.11 (0.04–0.52)        | 0.06 (0.01–0.32)               |
| 4) Relocation of high-risk individuals            | 0.33 (0.22–0.63)                          | 0.10 (0.07–0.35)         | 0.06 (0.04–0.24)        | 0.03 (0.01–0.13)               |
| 5) Routine twice-weekly PCR testing of staff only | 0.40 (0.29–0.69)                          | 0.16 (0.08–0.36)         | 0.10 (0.04–0.26)        | 0.03 (0.01–0.13)               |
| 6) Combination strategy                           | 0.68 (0.44–0.95)                          | 0.40 (0.16–0.83)         | 0.28 (0.09–0.73)        | 0.08 (0.03–0.53)               |

UI = uncertainty interval;  $R_0$  = basic reproduction number.

\* Outbreak defined as  $\geq 3$  infections originating within the shelter in any 14-day period.

† Generalized homeless shelter defined as 250 residents and 50 staff with a background infection rate estimated from recent data ( $\sim 120/1,000,000$  person-days).

‡ All strategies included daily symptom screening.

§ UI generated from parameter sensitivity analysis (see text and Table 1).

See Supplementary Table 9 and Figure 1 for results for other background infection rates, and Supplementary Table 10 for reductions in infections and symptomatic cases. See Supplementary Figures 6–8 for the outbreak size distributions for the different  $R_0$  values.



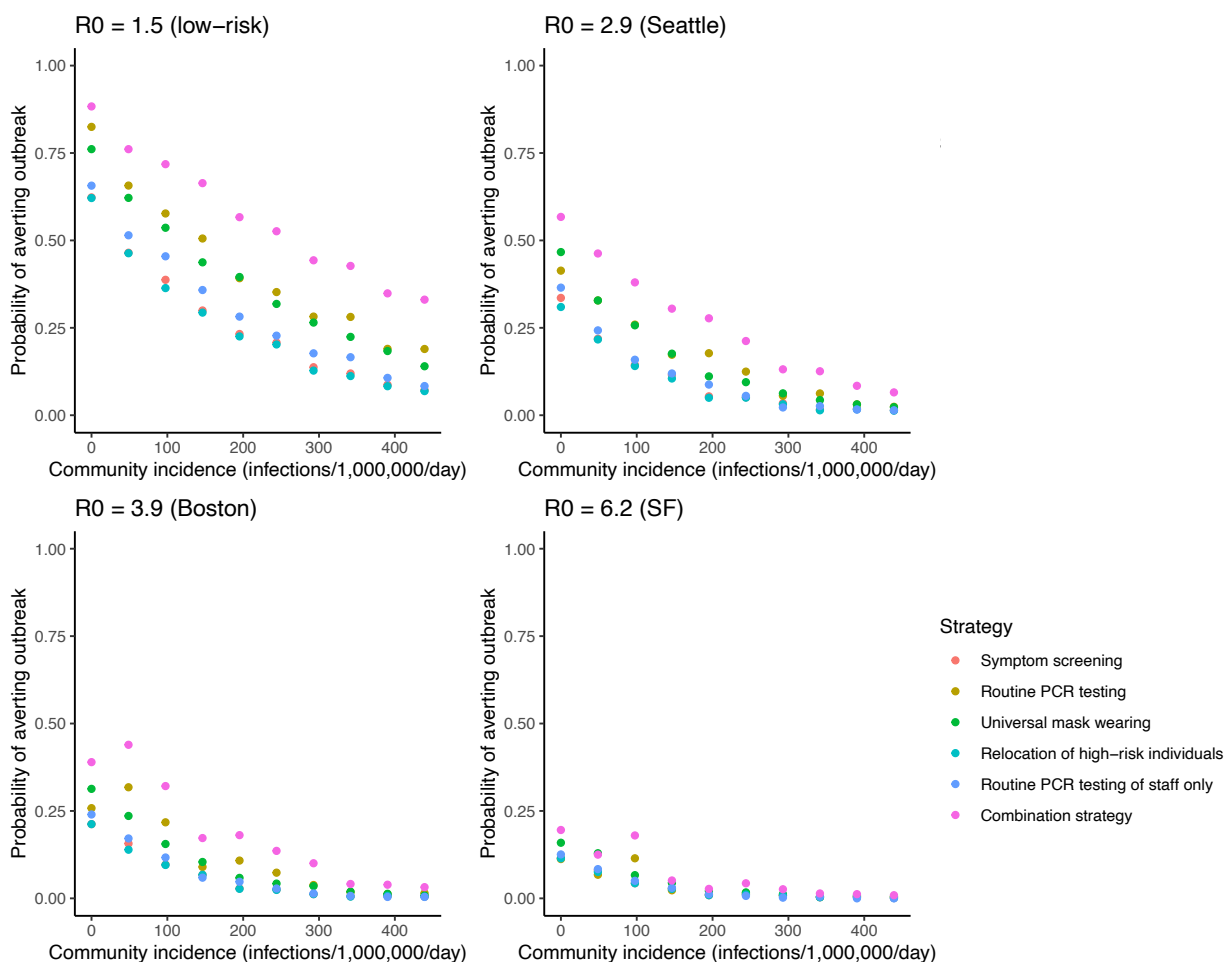

**Figure 1. Impact of incidence of infection in the community on the probability of averting an outbreak in a generalized homeless shelter under different intervention strategies for different  $R_0$  values.** The probability of averting an outbreak ( $\geq 3$  infections over any 14-day period) in a generalized homeless shelter of 250 residents and 50 staff over 30 days was estimated for different infection incidences in the community using the microsimulation model described in the text. SF = San Francisco.

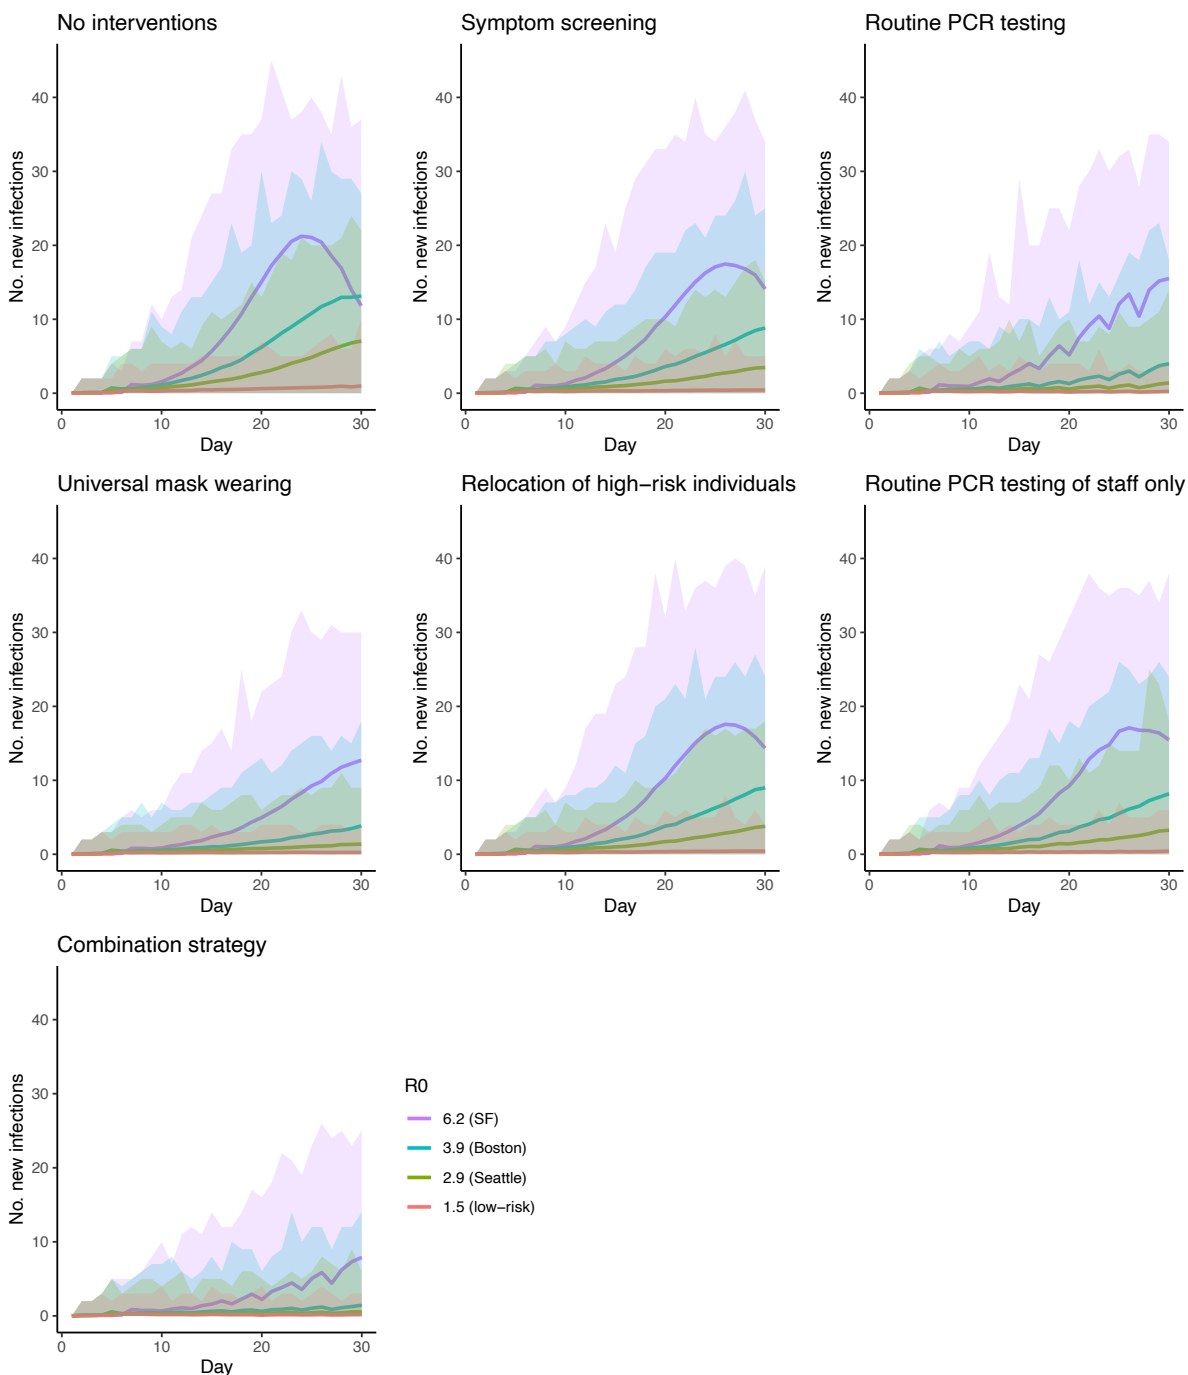

**Figure 2. Predicted number of COVID-19 infections over a 30-day period in a generalized homeless shelter under different infection control strategies for different  $R_0$  values.** Solid lines show mean daily numbers of new infections and shaded areas show minimum and maximum daily numbers over 1000 simulations. Background infection rate in the community outside the shelter of approximately 120 infections/1,000,000 person-days. SF = San Francisco.

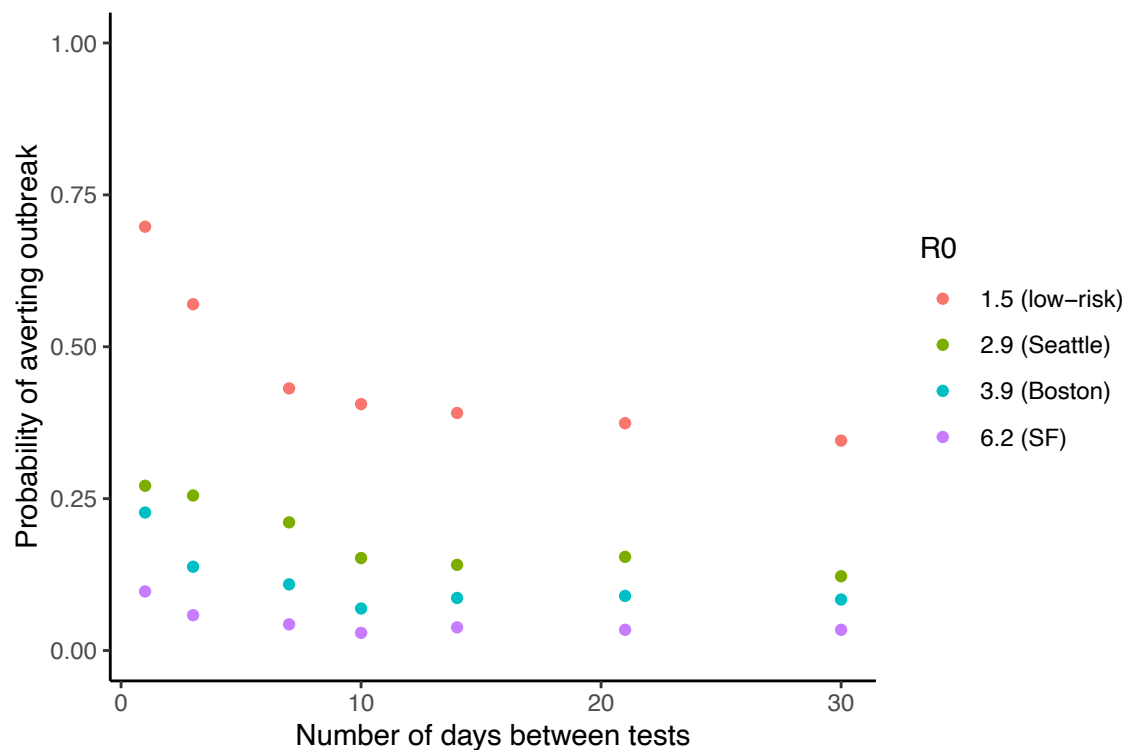

**Figure 3. Impact of varying the frequency of routine PCR testing of residents and staff on the probability of averting an outbreak in a generalized homeless shelter for different  $R_0$  values.** The probability of averting an outbreak ( $\geq 3$  infections over any 14-day period) over 30 days was estimated for different frequencies of routine PCR testing from daily (1 day between tests) to monthly (30 days between tests). Background infection rate in the local community of approximately 120 infections/1,000,000 person-days. SF = San Francisco.
