# Supplementary material for: Comparison of infection control strategies to reduce COVID-19 outbreaks in homeless shelters in the United States: a simulation study
Source: bioRxiv or medRxiv preprint supplement (doi:10.1101/2020.09.28.20203166), 2021-02-19
Supplement: Supplementary file [file media-1.pdf]

# Supplementary Material

## Supplementary methods

### Model description

Supplementary Figure 1 shows the structure of the discrete-time stochastic individual-level susceptible-exposed-infectious-recovered (SEIR) model used to simulate transmission in the shelter. On any given day  $t$  each individual is in one of the seven states shown in the flow diagram and defined in Supplementary Table 1.

The probabilities that individual  $i$  is infected on day  $t$  or avoids infection on day  $t$  given that they are susceptible to infection are:

$$p_i(t) = 1 - e^{-\lambda_i(t)}, \quad i \in \mathcal{S}(t)$$

$$1 - p_i(t) = e^{-\lambda_i(t)}, \quad i \in \mathcal{S}(t)$$

where  $\lambda_i(t)$  is the force of infection on each individual  $i$  on day  $t$ . The force of infection on each individual on each day is equal to the force of infection they are exposed to when inside the shelter, which is proportional to the prevalence of infectious individuals inside the shelter on that day and the infectiousness of these individuals, plus a background force of infection they are exposed to when outside the shelter in the community:

$$\lambda_i(t) = \frac{\beta \mathbb{I}_i(t) \left( h \left( \alpha I_{s,1}(t) + I_{s,2}(t) \right) + \alpha I_{c,1}(t) + I_{c,2}(t) \right)}{\sum_j \mathbb{I}_j(t)} + \epsilon. \quad (1)$$

Here  $\beta$  is the transmission rate coefficient within the shelter (assumed constant);  $\mathbb{I}_i(t)$  is an indicator function for whether the individual is present in the shelter on day  $t$ ; the  $I(t)$ 's represent the number of infectious individuals inside the shelter on day  $t$  in different states of infection – subclinical and clinical, denoted by subscripts  $s$  and  $c$  respectively, and early and late stage, denoted by subscripts 1 and 2 respectively;  $h$  is the infectiousness of subclinically infected individuals relative to those with clinical symptoms;  $\alpha$  is the infectiousness of the early infectious stage relative to the late stage; and  $\epsilon$  is the transmission rate outside of the shelter. Mixing of infectious and susceptible individuals in the shelter is assumed to be homogeneous due to a lack of contact data from the shelter outbreaks with which to parameterize inhomogeneous mixing. Transmission from the external community is modeled assuming homogeneous mixing of the shelter residents and staff with the community outside of the shelter during each day and negligible impact of infected individuals entering the community from the shelter on the overall background transmission rate. The background transmission rate is treated as constant given the relatively short durations of the outbreaks, and is estimated from the incidence of confirmed COVID-19 cases for the city of each shelter with adjustments for reporting delay, infection-to-onset time and relative risk of infection for homeless individuals as described below (see *Estimation of background infection rate* below).

44 We note that the formulation of the force of infection in equation (1) corresponds to frequency-  
 45 dependent transmission, i.e. assumes that the number of “contacts” per infectious individual in  
 46 the shelter per day is approximately constant regardless of the number of individuals present in  
 47 the shelter. We make this assumption in common with other authors [1] because it is believed  
 48 that the main mode of SARS-CoV-2 transmission is from person to person via respiratory  
 49 droplets containing virus particles [2], i.e. occurs over short distances predominantly among  
 50 close contacts of infectious individuals.

51  
 52 The duration  $D_E$  of the latent infection stage  $\mathcal{E}$ , is assumed to be negative-binomial, with mean  
 53  $\mu_E = 3$  days and shape parameter  $r_E = 4$ , i.e. probability mass function:  
 54

$$55 \quad \mathbb{P}(D_E = d) = \frac{\Gamma(d + r_E)}{\Gamma(r_E)d!} \left( \frac{r_E}{r_E + \mu_E - 1} \right)^{r_E} \left( \frac{\mu_E - 1}{r_E + \mu_E - 1} \right)^{d-1}, \quad d = 1, 2, \dots,$$

56  
 57 where  $\Gamma(z) = \int_0^\infty x^{z-1} e^{-x} dx$  is the gamma function. After passing through the latent stage,  
 58 individuals enter an early (presymptomatic) infectious stage ( $\mathcal{J}_{c,1}$ ) leading to clinical symptoms  
 59 with age-dependent probability  $\rho(a_i)$ , where  $a_i$  is the age group (<60 years/ $\geq$ 60 years) of  
 60 individual  $i$ , or an early infectious stage ( $\mathcal{J}_{s,1}$ ) leading to subclinical infection (no symptoms/very  
 61 mild symptoms) with probability  $1 - \rho(a_i)$ . After a negative-binomial number of days  
 62 ( $NB(r_1 = 4, \mu_1 = 2.3)$ ) of early stage infectiousness individuals progress to late stage  
 63 subclinical ( $\mathcal{J}_{s,2}$ ) or clinical ( $\mathcal{J}_{c,2}$ ) infectiousness.

64  
 65 Following a further negative-binomially-distributed duration ( $NB(r_2 = 4, \mu_2 = 8)$  with mean 8  
 66 days) subclinical cases recover and are no longer infectious and clinical cases either recover or  
 67 are hospitalized, and therefore no longer contribute to transmission in the shelter ( $\mathcal{R}$ ). See  
 68 Supplementary Table 1 for the key attributes of each infection state and Supplementary Table 5  
 69 for a full list of model parameters and their values. The probability of hospitalization for clinical  
 70 cases is age- and co-morbidity dependent (Supplementary Table 2), and hospitalized cases are  
 71 assumed to have a 26.1% risk of requiring intensive care based on data from Wuhan, China [3].  
 72 Cases admitted to the intensive care unit (ICU) have an age- and co-morbidity-dependent risk of  
 73 death estimated from ICU data from Wuhan, China [4,5].

74  
 75 *Basic reproduction number,  $R_0$*

76 The basic reproduction number for the model, defined as the average number of secondary  
 77 infections caused by the average infectious individual in an entirely susceptible shelter  
 78 population (in the absence of interventions) can be calculated from first principles as:

$$79 \quad R_0 = \text{probability of infection given "contact"} \times \text{"contact" rate} \times \text{duration of infectiousness}$$

$$80 \quad = \frac{\beta \sum_i \mathbb{I}_i(0) \left( (1 - \rho(a_i))h + \rho(a_i) \right) (\alpha\mu_1 + \mu_2)}{\sum_i \mathbb{I}_i(0)}$$

81  
 82  
 83 where “contact” is defined as susceptible individuals coming into contact with infectious  
 84 material from infected individuals, and the sums are over all individuals in the shelter (residents  
 85 and staff).  
 86

87 *Relative infectiousness of early infectious stage and subclinical infection*

88 Evidence suggests that infectiousness of symptomatic COVID-19 cases is not constant over time,  
89 but peaks at or shortly before symptom onset, such that pre-symptomatic individuals are more  
90 infectious than symptomatic individuals [6,7]. We approximated this variation in infectiousness  
91 over time by treating individuals' infectiousness as constant during each of the early and late  
92 infectious stages, but higher during the early infectious stage. The relative infectiousness of the  
93 early infectious stage to the late infectious stage,  $\alpha = 2$ , was chosen to approximately match the  
94 estimates of the proportion of pre-symptomatic transmission of He et al [6] and the lower range  
95 of those of Casey et al [7] of 44% and 34% respectively, assuming a mean duration of the early  
96 infectious stage of  $\mu_1 = 2.3$  days[6]:  
97

98 proportion of transmission from early infectious stage =  $\frac{\alpha\mu_1}{\alpha\mu_1 + \mu_2} = \frac{2 \times 2.3}{2 \times 2.3 + 8} = 37\%$ ,

99  
100 We used the lower range of the estimates of Casey et al for the base case analysis, as we believe  
101 that estimates of pre-symptomatic infectiousness are likely to be biased upward due to behavior  
102 changes (e.g. self-isolation) upon symptom onset that reduce transmission from symptomatic  
103 individuals in general settings but are less likely to apply in congregate shelter settings.  
104 However, we also considered higher relative infectiousness (up to 3) in the sensitivity analysis.  
105 We assumed the same relative infectiousness of early stage infection for clinical infection and  
106 subclinical infection.  
107

108 Subclinically infected individuals were assumed to be as infectious as clinical cases in the base  
109 case analysis, due to limited data on the relative infectiousness of subclinical infection and the  
110 detection of similar viral load in asymptomatic individuals as symptomatic individuals in several  
111 studies [6,8]. Lower relative infectiousness of subclinical infection (down to 50%) was  
112 considered in the sensitivity analysis.  
113

114 *Duration of detectable viral load*

115 Studies that have measured the viral load of individuals infected with SARS-CoV-2 over time  
116 since symptom onset suggest that the virus remains detectable from throat and nasal swabs and  
117 sputum and stool samples for longer (~20 days after symptom onset) than individuals remain  
118 infectious (~7 or 8 days after symptom onset) [6,9]. We therefore modelled the duration of  
119 detectable viral load for each infected individual by assigning a random draw from a truncated  
120 discretized normal distribution that characterizes the variation in this duration (Supplementary  
121 Figure 3) to each individual when they enter the late infectious stages  $\mathcal{J}_{s,2}$  and  $\mathcal{J}_{c,2}$ . We chose the  
122 parameters of the distribution based on data on the variation in times after symptom onset at  
123 which individuals' viral loads reach the PCR detection limit from several studies [6,9–13], with  
124 minimum and maximum durations of 5 days and 37 days.  
125

126 We assumed that individuals in the early infectious stages  $\mathcal{J}_{s,1}$  and  $\mathcal{J}_{c,1}$  always have detectable  
127 viral loads and that in the latent infection stage the viral load is undetectable. We treated the  
128 duration of detectable viral load as being the same for subclinical and clinical infection and  
129 independent of the individual's duration of infectiousness. This means that individuals can still  
130 have a detectable viral load when they are no longer infectious and are in the recovered  
131 compartment ( $\mathcal{R}$ ). It is likely that there is some correlation between viral load and symptom

132 severity and infectious duration (and other factors such as age), but as of yet there is insufficient  
133 data with which to parameterize these relationships and studies measuring viral loads over time  
134 by age and severity have shown mixed results [6,14–16].

### 135 136 *Sensitivity and specificity of PCR tests*

137 Although there is some evidence to suggest that the sensitivity of PCR tests varies with time  
138 since infection (i.e. that it is lower during early and late infection) [17], the data currently  
139 available to accurately characterize this variation is very limited. We therefore made the  
140 simplifying assumption that the sensitivity of PCR tests is constant with time since the start of  
141 infectiousness (time of entering the early infectious stages  $J_{s,1}$  and  $J_{c,1}$ ) and use a fixed  
142 sensitivity of 75% based on available data [17–20] for the base case analysis. We assumed  
143 perfect specificity of PCR tests for the base case analysis, i.e. no false positive test results, as  
144 current evidence suggests that they have high specificity (~99%) [17,20], but also considered  
145 lower specificity in the sensitivity analysis.

### 146 147 *Estimation of background infection rate during shelter outbreaks*

148 We used publicly available data on daily numbers of new confirmed COVID-19 cases in the city  
149 of each shelter from county public health departments to estimate the background infection rate  
150 [21–23]. We assumed a fixed delay from infection to reporting of 7 days, corresponding to 2  
151 days of pre-symptomatic infection and 5 days of symptoms before reporting [24,25], and so used  
152 case counts 7 days ahead as an estimate of the number of new reported infections on each day.  
153 We estimated the infection incidence in the community outside the shelter during the period of  
154 each shelter outbreak,  $i_a$ , from the delay-adjusted case counts for the city of the shelter over the 3  
155 weeks prior to the end date of data collection,  $T_{end}$ , as:

$$156 \quad 157 \quad i_a = \frac{\gamma \sum_{t=T_{end}-14}^{T_{end}+7} n_t}{P}, \quad (2)$$

158 where  $n_t$  is the number of new confirmed cases reported on day  $t$ ,  $P$  is the city population [26],  
159 and  $\gamma$  is an under-reporting factor to account for only a proportion of infections being reported.  
160 For the period of the shelter outbreaks we used  $\gamma = 10$ , based on estimated infection-to-  
161 reported-case ratios from seroprevalence data for the period of late March–early May from 10  
162 different localities across the US [27]. For the intervention simulations, we used  $\gamma = 4$ , based on  
163 lower estimates from seroprevalence data for late May–June from a continuation of the same  
164 study [28]. We then estimated the background infection rate in homeless individuals outside of  
165 the shelter as:

$$166 \quad 167 \quad 168 \quad \epsilon = r i_a,$$

169 where  $r$  is a relative risk of infection for homeless individuals. Based on data from Seattle &  
170 King County, WA, where 1.5% of the population is homeless (11199/753675)[26,29] and  
171 homeless individuals account for 2.5% (445/18130) of confirmed COVID-19 cases [21,30], we  
172 use an approximate relative risk for homeless individuals of  $r = 2$ .  
173

### 174 175 **Model calibration**

176 We calibrated the model by fitting to data on numbers of PCR-positive and negative individuals  
177 in testing conducted in outbreaks in 5 homeless shelters in 3 different cities: San Francisco (n=1),  
178 Boston (n=1) and Seattle (n=3). Prevalence of PCR positivity among residents and staff during  
179 mass testing events in these shelters was markedly different, ranging from 2.6%–51.6%. This is  
180 likely partly due to testing being conducted at different times after the outbreaks started, but  
181 likely also reflects differences in transmissibility due to other factors, such as variation in  
182 infectiousness between individuals, shelter living density, bed spacing, air ventilation quality,  
183 and differences in shared washing and eating facilities. We therefore fitted the model separately  
184 to the data from each of these outbreaks to estimate the basic reproduction number,  $R_0$ , for each  
185 setting. Given uncertainty in when the first infected individuals entered each shelter and how  
186 many of them there were, due to asymptomatic infection and incomplete detection of early cases,  
187 we also estimated the time since introduction of infection into the shelter at the end of the data  
188 collection period,  $T$ , and the initial number of latently infected individuals who entered the  
189 shelter,  $E_0$ . We assumed that the individual(s) who initially introduced infection into the shelter  
190 were all latently infected when they entered, since a large range of scenarios in which they were  
191 in a later infection stage or mixture of infection stages are covered by the flexibility in the  
192 introduction time and the initial number infected. We also assumed that following the initial  
193 introduction into the shelter any further introductions were solely as a result of residents and staff  
194 being infected when mixing with the community outside the shelter and then returning to the  
195 shelter.

196  
197 Since more detailed individual-level data on PCR test results and symptom onset times for  
198 clinical cases was available for the outbreak in the San Francisco shelter, we also used the  
199 numbers of early symptomatic cases who tested PCR-positive and daily numbers of new  
200 symptom onsets when calibrating the model to this outbreak (see Supplementary Figure 4 and  
201 S5A Fig). As exact dates of testing during the cross-sectional surveys in the Seattle and Boston  
202 shelters were not available, we assumed that all testing occurred on the last day of each survey.  
203 For all the outbreaks, we assumed that PCR tests took a day to be processed, such that results  
204 were returned and positive individuals removed the day following testing (except on April 10<sup>th</sup> at  
205 the San Francisco shelter, when negative individuals were removed instead).

206  
207 Aggregate data (by age and co-morbidity risk group) on movement of individuals in and out of  
208 the shelter over time was only available for the San Francisco shelter, so we ensured that the  
209 population of this shelter matched that in the shelter registry (see *Demographics and movement*  
210 *of individuals in and out of the shelter* below) and assumed that the populations of the other  
211 shelters remained approximately constant over the period of data collection. Residents' age  
212 categories in the Seattle and Boston shelters were set according to data on the age distributions  
213 from [31] and [32]. For all shelters, staff were assumed to be all <60-years-old and at low risk of  
214 hospitalization and death.

215  
216 *Approximate Bayesian Computation algorithm*

217 We fitted the model to the data using an approximate Bayesian computation sequential Monte  
218 Carlo (ABC-SMC) algorithm [33–35] to estimate  $R_0$ ,  $E_0$ , and  $T$ . Since  $E_0$  and  $T$  are discrete  
219 parameters, we adapted the model selection algorithm of Toni et al [34,35] by replacing the  
220 model index as the discrete parameter with the discrete parameter pair  $m = (E_0, T)$  (i.e. the  
221 model indices by the different possible combinations of  $E_0$  and  $T$ ). The algorithm starts by

222 sampling pairs  $m^* = (E_0^*, T^*)$  from the prior distribution  $\pi(m)$ , and corresponding  $R_0$  values,  
 223  $R_0^{**}$ , from the prior distribution  $\pi(R_0)$ ; simulating outbreaks with these parameter values  
 224 (particles); and accepting those for which the simulated number of PCR-positives  $D^*$  falls within  
 225 a certain pre-specified tolerance  $\epsilon_1$  of the observed number of PCR-positives  $D$  according to a  
 226 distance measure  $d(\cdot)$ , i.e.  $d(D, D^*) \leq \epsilon_1$ . A sequence of distributions (generations) is then  
 227 constructed by repeating this process with a set of decreasing tolerances  $\epsilon = \{\epsilon_g\}_{g=1,2,\dots}$ ,

228 proposing  $R_0$  values for each value of  $m$  in each generation by perturbing the particles ( $R_0$   
 229 values) specific to  $m$  from the previous generation using a perturbation kernel  $K(R_0|R_0^*)$ . In this  
 230 way, the particles in successive generations converge towards the joint posterior distribution of  
 231 the parameters given the data. Pseudocode for the algorithm is as follows:

- 232 1. Set the number of generations  $G$  and number of particles  $N$ .
- 233 2. Set the tolerance schedule  $\epsilon_1 > \epsilon_2 > \dots > \epsilon_G$ . Set the generation index  $g = 1$ .
- 234 3. Set the particle index  $i$  to 1.
- 235 4. Sample  $m^*$  from the prior distribution  $\pi(m)$ . If  $g = 1$ , sample  $R_0^{**}$  from the prior  
 236 distribution  $\pi(R_0)$ . If  $g > 1$ , sample  $R_0^*$  from the previous generation  $\{R_0(m^*)_{g-1}\}$  with  
 237 weights  $w(m^*)_{g-1}$ , and perturb the particle  $R_0^*$  to obtain  $R_0^{**} \sim K(R_0|R_0^*)$ .
- 238 5. If  $\pi(R_0^{**}) = 0$ , return to step 4.
- 239 6. Run a simulation of the outbreak and PCR testing for the sampled values  $(R_0^{**}, m^*)$  to  
 240 generate a candidate dataset  $D^{**}$ .
- 241 7. If  $\widehat{\mathbb{P}}(D|D^*) = \mathbb{I}(d(D, D^*) < \epsilon_g) = 0$ , return to step 4.
- 242 8. Set  $m_g^{(i)} = m^*$ , and add  $R_0^{**}$  to the population of particles  $\{R_0(m^*)_g\}$  and calculate its  
 243 weight as:

$$244 \quad w_g^{(i)} = \begin{cases} 1, & \text{if } g = 1 \\ \frac{\pi(R_0^{**})}{\sum_{i; m_{g-1} = m^*} \frac{w_{g-1}^{(i)} K(R_0^{**}|R_{0,g-1}^{(i)})}{\mathbb{P}(m_{g-1} = m^*)}}, & \text{if } g > 1 \end{cases}$$

- 245 9. If  $i < N$ , set  $i = i + 1$  and go to step 4.
- 246 10. Normalize the weights  $w_g$  such that  $\sum_{i=1}^N w_g^{(i)} = 1$ .
- 247 11. Calculate the marginal probabilities for the combinations  $m = (E_0, T)$ , by summing the  
 248 weights for each combination:

$$249 \quad \mathbb{P}(m_g = m) = \sum_{i; m_g^{(i)} = m} w_g^{(i)} \left( R_{0,g}^{(i)}, m_g^{(i)} \right).$$

- 250 12. If  $g < G$ , set  $g = g + 1$  and go to step 3.

251  
 252 We used  $G = 10$  generations, with  $N = 1000$  particles in each generation, and a normal  
 253 perturbation kernel for  $R_0$ ,  $K(R_0|R_0^*) \sim N(R_0^*, \sigma^2)$ , with standard deviation  $\sigma = 1$ . We used broad  
 254 uniform prior distributions due to a lack of information to support more informative prior  
 255 distributions:  $R_0 \sim U(1,8)$ ,  $m = (E_0, T) \sim U(1,5) \times U(14,30)$  (for all shelters except Seattle  
 256 shelter B, for which  $m \sim U(1,10) \times U(13,20)$ ), where the prior for  $m$  is discrete with integer  
 257 support. The wide bounds for the prior for  $R_0$  were chosen based on the large range of basic  
 258 reproduction numbers reported in the literature[24] and demonstrated potential of COVID-19 for  
 259 superspreading events [36–40]. The 14-day lower bound of the prior for  $T$  was chosen based on  
 260 the symptom onsets of the first cases identified in each of the shelters being at least 9 days before

261 the end of data collection and the mean incubation period being approximately 5 days, such that  
 262 the first cases were unlikely to have been infected later than 14 days before the end of data  
 263 collection. Thirty days was taken as the upper bound for  $T$  based on it giving the earliest  
 264 plausible time for introduction of infection into the shelters without earlier occurrence and  
 265 detection of symptomatic cases. Lower bounds were used for the prior for  $T$  for Seattle shelter B  
 266 to reflect the fact that it did not report any symptomatic cases before the first mass testing event  
 267 on March 30–April 1 and had a very low prevalence of infection at that survey.

268  
 269 We used the sum of squared differences between the numbers of PCR-positives on the testing  
 270 days,  $\mathbf{T}_T$ , in the simulations,  $D^*$ , and those in the observed data,  $D$ , for the distance metric  
 271  $d(D, D^*)$ :  
 272

$$273 \quad d(D, D^*) = \sqrt{\sum_{t \in T_T} (D_t - D_t^*)^2}$$

274  
 275 For the tolerance schedule  $\epsilon^T = (\epsilon_1, \dots, \epsilon_G)$  we used regular steps decreasing from a discrepancy  
 276 of twice the daily number of PCR-positives,  $\epsilon_1 = \sqrt{\sum_t (2D_t)^2}$ , to half the width of the exact  
 277 binomial confidence interval on the number of PCR-positives on each day. For the San Francisco  
 278 shelter, we used additional distance metrics,  $d^S(D^S, D^{S*})$  and  $d^C(D^C, D^{C*})$ , and tolerance  
 279 schedules,  $\epsilon^S$  and  $\epsilon^C$ , for the differences in the simulated and observed numbers of PCR-  
 280 positives among early symptomatic cases tested,  $D^{S*}$  and  $D^S$ , on days  $\mathbf{T}_S$  (3/30/20–4/7/20) and  
 281 the differences in the simulated and observed daily numbers of symptom onsets,  $D^{C*}$  and  $D^C$ :  
 282

$$283 \quad d^S(D^S, D^{S*}) = \sqrt{\sum_{t \in T_S} (D_t^S - D_t^{S*})^2}$$

$$284 \quad d^C(D^C, D^{C*}) = \sqrt{\sum_{t=1}^T (D_t^C - D_t^{C*})^2}$$

285  
 286 Since the symptom onset data is less reliable than the PCR test data and potentially incomplete,  
 287 we used less strict tolerances for  $\epsilon^S$  and  $\epsilon^C$ , decreasing from discrepancies of twice the daily  
 288 observed number of PCR-positives among early symptomatic cases and twice the daily number  
 289 of new symptom onsets to 2/3 and 1.3 times the observed daily numbers respectively:

$$290 \quad \epsilon^S = (11, 10, 9, 9, 8, 7, 6, 5, 5, 4)$$

$$291 \quad \epsilon^C = (49, 47, 45, 43, 41, 39, 37, 36, 34, 32).$$

292 Proposed values of  $(R_0, E_0, T)$  were accepted at each generation  $g$  only if all tolerances were  
 293 satisfied, i.e. only if  $d(D, D^*) \leq \epsilon_g$  and  $d^S(D^S, D^{S*}) \leq \epsilon_g^S$  and  $d^C(D^C, D^{C*}) \leq \epsilon_g^C$ .

294  
 295 We assessed the performance of the algorithm by calculating the effective sample size (ESS) of  
 296 the final generation of particles,  $ESS = 1 / \sum_{i=1}^N (w_G^{(i)})^2$ , and the acceptance rate of proposed  
 297 particles in each generation.  
 298

299 **Details of San Francisco shelter outbreak**

300 Full details of the outbreak in the San Francisco shelter are provided elsewhere [41]. Briefly, the  
301 data consisted of individual-level information on age, PCR test date and result, and partial data  
302 on symptom status, co-morbidity, and health outcome. The first two clinical cases identified in  
303 the shelter were confirmed on April 5, 2020 from PCR tests on April 4 and 5, 2020. The first  
304 case had symptom onset on March 31, the second on April 2. However, several individuals who  
305 later tested PCR-positive reported that they had symptom onset around these dates  
306 (Supplementary Table 3 and S5A Fig). After the first cases were identified on April 4, contact  
307 tracing, symptom screening and PCR testing of symptomatic individuals was performed up to  
308 April 7. On April 8 and 9 mass testing of residents and staff was performed. As of April 10,  
309 2020, 89 individuals out of 175 tested in the shelter were PCR-positive, of whom 65 were pre-  
310 symptomatic/symptomatic (2 unknown status), 4 required hospitalization (2 unknown outcome),  
311 and 1 died. Supplementary Table 3 shows the numbers of positive test results returned from the  
312 different testing that was conducted by day of testing and number of new symptom onsets each  
313 day.

314  
315 *Demographics and movement of individuals in and out of the shelter*

316 Even before the first cases in the shelter in San Francisco were identified, the shelter was not  
317 running at capacity (340 residents) and efforts were made to move high-risk individuals (those  
318 aged 60 and over or with co-morbidities) out of the shelter. Following identification of the first  
319 cases on April 5, progressively more and more individuals were removed from the shelter into  
320 isolation and quarantine at various sites; first those identified as close contacts and bedmates of  
321 the first cases and those suspected of being infected, then later on April 10 PCR-negative  
322 individuals, particularly high-risk individuals. Efforts were made to cohort the remaining  
323 residents into those who were PCR-positive and those with unknown COVID-status, but this was  
324 hampered by individuals returning to the shelter on the evening of April 10. The shelter was  
325 disbanded and all residents and staff were moved to isolation and quarantine sites on April 11.

326  
327 According to the shelter register, there were a total of 255 residents who were present at some  
328 point from March 29 to April 10, 2020. Supplementary Figure 2 shows the breakdown of the  
329 number of residents in each of the different risk groups (no co-morbidities and under-60, co-  
330 morbidity and under-60, no co-morbidities and 60 or over, co-morbidities and 60 or over)  
331 present on each day from March 29 to April 10. We initialized the resident population of the  
332 shelter in the simulations such that the numbers in the different risk groups matched those  
333 present on March 29, and assumed the numbers in the different groups remained constant prior to  
334 March 29. We assumed that the proportions of the remaining individuals not present on March  
335 29 in the different risk groups were the same as among those present. The movement of residents  
336 in and out of the shelter each day was simulated by randomly drawing individuals from each risk  
337 group to remove/add such that the number present in each risk group matched that in the register,  
338 accounting for the removal of symptomatic PCR-positive individuals from the testing from April  
339 4-8 and their risk group.

340  
341 A total of 64 staff, covering general running of the shelter, support services, maintenance,  
342 laundry and food services over 3 shifts per day with approximately 20-25 staff on each shift,  
343 were present at some point from March 29 to April 10. Due to a lack of detailed information on  
344 staff demographics and movement we assumed that all staff had low risk of clinical symptoms,



345 hospitalization and death (were all under-60 without co-morbidities), and were present in the  
346 shelter each day for approximately the same amount of time as the average resident, such that  
347 they had the same risk of infection as residents.

348

### 349 **Estimation of impact of different interventions**

350 We estimated the impact of six different intervention strategies, listed in Supplementary Table 6  
351 with their component interventions, on the probability of averting an outbreak and the total  
352 numbers of infections, clinical cases, hospitalizations and deaths over 30 days in a shelter of 250  
353 residents and 50 staff into which one latently infected individual is introduced by comparing  
354 output of simulations in which there were interventions with counterfactual simulations without  
355 any interventions. An outbreak was defined as  $\geq 3$  cases that originated within the shelter within  
356 any 14-day period, which we determined by probabilistically assigning an infection source  
357 (background transmission vs infectious individuals within the shelter) to each infected individual  
358 upon infection in the simulations and tracking the number of infections whose source was within  
359 the shelter over time. We ran 1000 simulations for each intervention strategy and the  
360 counterfactual scenario, and calculated the probability of averting an outbreak from pairs of  
361 counterfactual and intervention simulations as the proportion of simulation pairs with an  
362 outbreak in the no-intervention scenario in which there was no outbreak in the intervention  
363 scenario:

$$\begin{aligned} 365 \mathbb{P}(\text{outbreak averted}) &= \frac{\mathbb{P}(\text{no outbreak with intervention} | \text{outbreak without intervention})}{\mathbb{P}(\text{outbreak without intervention})} \\ 366 &= \frac{\#(\text{pairs with no outbreak in intervention simulation \& an outbreak in counterfactual simulation})}{\#(\text{counterfactual simulations with an outbreak})} \end{aligned}$$

367

368 Reductions in cumulative incidence of infections and clinical cases under each intervention  
369 strategy were calculated as the median percentage reduction in total number of infections/clinical  
370 cases between the counterfactual simulation and the intervention simulation across all simulation  
371 pairs, where the percentage reduction was treated as 0 if there were no cases in the counterfactual  
372 simulation.

373

### 374 **Scenario and sensitivity analyses**

375 To assess the effect of the transmission potential within the shelter ( $R_0$ ) and the background  
376 infection rate ( $i_a$ ) on intervention impact, we predicted the impact of the different intervention  
377 strategies for the different  $R_0$  estimates from the calibration ( $R_0 = 2.9$  (Seattle A), 3.9 (Boston),  
378 6.2 (San Francisco)) and  $R_0 = 1.5$  (representing a lower-risk setting) for different background  
379 infection rates estimated from recent incidence of confirmed cases in Seattle, Boston and San  
380 Francisco. The background infection rates were estimated as in Equation (2) but with the limits  
381 in the sum replaced by July 4 and July 17, 2020 (to represent reported incidence for June 27–July  
382 10, 2020, with a 7-day infection-to-reporting delay) and an infection-to-reported-case ratio,  $\gamma$ , of  
383 4 [28]. This gave background infection rates ranging from 122/1,000,000/day for Boston to  
384 439/1,000,000/day for San Francisco. We used the limits of this range and the mean across the  
385 three cities, along with a zero background infection rate, for the scenario analyses. The results  
386 are provided in Table 2 in the main text and Supplementary Tables 9 and 10. We also assessed  
387 the variation in the probability of averting an outbreak under each intervention strategy for a  
388 larger number of background infection rates over the same range (Figure 1 in the main text).

389  
390 We assessed the sensitivity of the intervention impact estimates to uncertainty in key natural  
391 history and intervention parameters (relative infectiousness of subclinical infection and the early  
392 infectious stage, sensitivities and specificities of symptom screening and PCR tests, testing and  
393 masking compliances, and mask effectiveness) by simulating each intervention strategy with all  
394 combinations of minimum and maximum values of these parameters over their uncertainty  
395 ranges (Supplementary Table 5) for the base case background infection rate of  
396 122/1,000,000/day. We then calculated the minimum and maximum values of the outcome  
397 measures (probability of averting an outbreak and reduction in total numbers of infections and  
398 clinical cases) over all parameter combinations to generate uncertainty intervals around the base  
399 case estimates of the outcome measures (Table 2 in the main text). The sensitivity of the  
400 probability of averting an outbreak to variation in the different parameter values is shown in  
401 Supplementary Figure 9 and discussed in the main text.

## 402 **Supplementary results**

403

### 404 **Model calibration**

405 Supplementary Figure 10 shows the posterior distributions and pairwise correlation plots for the  
406 calibrated parameters  $R_0$ ,  $E_0$  and  $T$  for each of the shelters. The considerable uncertainty in the  
407 parameter estimates due to the predominantly cross-sectional aggregate nature of the data is  
408 reflected in the broad posterior distributions, covering most of the range of the prior  
409 distributions for the parameters for all the shelters except the San Francisco shelter, and the  
410 strong correlation between  $R_0$  and  $T$  for the Boston and San Francisco shelters.

411 The effective sample sizes of the output for the different shelters ranged between 640 for Seattle  
412 shelter C and 951 for the San Francisco shelter, indicating that a sufficient number of particles  
413 was used to estimate the posterior distributions. The acceptance rates varied across shelters and  
414 decreased over successive generations, remaining above 50% for all of the Seattle shelters but  
415 decreasing to 4% for the San Francisco shelter, but overall suggest that the algorithm sampled  
416 efficiently from the posterior distributions.

417

### 418 **Impact of infection control strategies**

419 The relative impact of the different infection control strategies on reducing cumulative infection  
420 incidence followed the same pattern as the probability of averting an outbreak (cf.

421 Supplementary Table 10 with Table 2 in the main text and Supplementary Table 9). However,  
422 the percentage reduction in cumulative incidence varied non-linearly with  $R_0$  due to the bimodal  
423 nature of the outbreak size distribution (Supplementary Figures 6–8), such that the highest  
424 percentage reductions were achieved for the  $R_0 = 2.9$  scenario. Daily symptom screening alone,  
425 and daily symptom screening with relocation of high-risk individuals led to reductions in  
426 cumulative incidence of 9% for  $R_0 = 6.2$  to 45% and 43% for  $R_0 = 2.9$ . Twice-weekly PCR  
427 testing of staff provided modest additional benefit, increasing the percentage reduction to 13-  
428 54%. Reductions under universal masking and twice-weekly PCR testing of all residents and  
429 staff were much greater (51–75% and 37–81%), though the impact of PCR testing attenuated  
430 more than that of masking with increasing  $R_0$ . The highest percentage reductions of 71–90%  
431 were achieved under the combination strategy, with the biggest gain from combining  
432 interventions occurring in the highest transmissibility setting ( $R_0 = 6.2$ ).

433

434 The pattern of impact of the intervention strategies in terms of reduction in total numbers of  
435 clinical cases was the same (Supplementary Table 10), except for relocation of high-risk  
436 individuals, which led to greater percentage reductions in clinical cases than symptom screening  
437 and routine PCR testing of staff. Total numbers of hospitalizations and deaths over 30 days were  
438 small with or without interventions (medians  $\leq 4$ ) and therefore not considered relevant at the  
439 scale of a single shelter.

440

**Supplementary Table 1. Definition of states in the transmission model**

| State                       | Symbol                 | Infectious | Symptomatic            | Detectable viral load | Immune |
|-----------------------------|------------------------|------------|------------------------|-----------------------|--------|
| Susceptible                 | $\mathcal{S}(t)$       | ✗          | ✗                      | ✗                     | ✗      |
| Exposed to infection        | $\mathcal{E}(t)$       | ✗          | ✗                      | ✗                     | ✗      |
| Early subclinical infection | $\mathcal{I}_{s,1}(t)$ | ✓          | ✗                      | ✓                     | ✗      |
| Late subclinical infection  | $\mathcal{I}_{s,2}(t)$ | ✓          | ✗/✓ (no/mild symptoms) | ✓                     | ✗      |
| Early clinical infection    | $\mathcal{I}_{c,1}(t)$ | ✓          | ✗                      | ✓                     | ✗      |
| Late clinical infection     | $\mathcal{I}_{c,2}(t)$ | ✓          | ✓                      | ✓                     | ✗      |
| Recovered                   | $\mathcal{R}(t)$       | ✗          | ✗                      | ✓/✗                   | ✓      |

441

442

443 **Supplementary Table 2. Risk of clinical symptoms and hospitalization by age**  
 444 **group and co-morbidity status**

| Risk group                                         | Probability of developing clinical symptoms, $\rho(a_i)$ | Probability of hospitalization for clinical cases | Probability of death for hospitalized cases admitted to ICU |
|----------------------------------------------------|----------------------------------------------------------|---------------------------------------------------|-------------------------------------------------------------|
| Low risk: age <60 yrs + no co-morbidities          | 0.473                                                    | 0.040                                             | 0.22                                                        |
| Moderate risk: age <60 yrs + co-morbidities        | 0.473                                                    | 0.085                                             | 0.58                                                        |
| High risk: age $\geq$ 60 yrs + no co-morbidities   | 0.747                                                    | 0.289                                             | 0.52                                                        |
| Very high risk: age $\geq$ 60 yrs + co-morbidities | 0.747                                                    | 0.618                                             | 1                                                           |

445  
 446

447 **Supplementary Table 3. Numbers of PCR-positive individuals by day of test result**  
 448 **and daily new symptom onsets in San Francisco shelter March 28–April 10, 2020**

| Date   | Number tested in random testing | Number PCR-positive in random testing | Number of early symptomatic cases tested | Number of early symptomatic cases PCR-positive | Number of new symptom onsets |
|--------|---------------------------------|---------------------------------------|------------------------------------------|------------------------------------------------|------------------------------|
| Mar 28 | 1                               | 0                                     | 0                                        | -                                              | 2                            |
| Mar 29 | 1                               | 0                                     | 0                                        | -                                              | 0                            |
| Mar 30 | 2                               | 0                                     | 1                                        | 0                                              | 3                            |
| Mar 31 | 0                               | -                                     | 0                                        | -                                              | 2                            |
| Apr 1  | 0                               | -                                     | 0                                        | -                                              | 3                            |
| Apr 2  | 0                               | -                                     | 0                                        | -                                              | 1                            |
| Apr 3  | 0                               | -                                     | 0                                        | -                                              | 1                            |
| Apr 4  | 1                               | 0                                     | 1                                        | 1                                              | 2                            |
| Apr 5  | 0                               | -                                     | 1                                        | 1                                              | 3                            |
| Apr 6  | 0                               | -                                     | 3                                        | 2                                              | 7                            |
| Apr 7  | 1                               | 0                                     | 5                                        | 5                                              | 3                            |
| Apr 8  | 89                              | 35                                    | -                                        | -                                              | 4                            |
| Apr 9  | 64                              | 44                                    | -                                        | -                                              | 16                           |
| Apr 10 | 5                               | 1                                     | -                                        | -                                              | 15                           |

449  
 450

451 **Supplementary Table 4. Numbers of residents and staff PCR tested and PCR**  
 452 **positive at three shelters in Seattle during two testing events March 30–April 1,**  
 453 **2020 and April 7–8, 2020**

| Shelter    | Testing event 1 (Mar 30–Apr 1, 2020) |                  | Testing event 2 (Apr 7–8, 2020) |                  |
|------------|--------------------------------------|------------------|---------------------------------|------------------|
|            | No. tested                           | No. (%) positive | No. tested                      | No. (%) positive |
| Seattle A* |                                      |                  |                                 |                  |
| Residents  | 43                                   | 7 (16.3)         | -                               | -                |
| Staff      | 15                                   | 4 (26.7)         | -                               | -                |
| Seattle B  |                                      |                  |                                 |                  |
| Residents  | 74                                   | 2 (2.7)          | 52                              | 4 (7.7)          |
| Staff      | 2                                    | 0 (0)            | 8                               | 1 (12.5)         |
| Seattle C  |                                      |                  |                                 |                  |
| Residents  | 37                                   | 6 (16.2)         | 44                              | 10 (22.7)        |
| Staff      | 10                                   | 0 (0)            | 7                               | 1 (14.3)         |

\* Shelter A closed April 5, 2020, so data from testing event 2 was not used.

454  
 455  
 456

**Supplementary Table 5. Input parameters for microsimulation of COVID-19 transmission in homeless shelters**

| Parameter                                                                                        | Symbol  | Base case value                           | Range in sensitivity analysis | References  |
|--------------------------------------------------------------------------------------------------|---------|-------------------------------------------|-------------------------------|-------------|
| <i>Demography</i>                                                                                |         |                                           |                               |             |
| Number of residents                                                                              |         |                                           |                               |             |
| Seattle A                                                                                        |         | 43                                        | -                             | [31]        |
| Seattle B                                                                                        |         | 109                                       | -                             | [31]        |
| Seattle C                                                                                        |         | 93                                        | -                             | [31]        |
| Boston                                                                                           |         | 408                                       | -                             | [42]        |
| San Francisco                                                                                    |         | Time-varying (see Supplementary Figure 2) | -                             |             |
| Number of staff                                                                                  |         |                                           |                               |             |
| Seattle A                                                                                        |         | 15                                        | -                             | [31]        |
| Seattle B                                                                                        |         | 8                                         | -                             | [31]        |
| Seattle C                                                                                        |         | 10                                        | -                             | [31]        |
| Boston                                                                                           |         | 50                                        | -                             | [42]        |
| San Francisco                                                                                    |         | 64                                        | -                             |             |
| Age group of individual $i$ (<60 years, ≥60 years)                                               | $a_i$   | Shelter-specific (see text)               |                               | [31,32]     |
| <i>Natural history</i>                                                                           |         |                                           |                               |             |
| Mean duration of latent infection period, days                                                   | $\mu_E$ | 3                                         | -                             | [6]         |
| Shape parameter of negative-binomially-distributed latent infection period                       | $r_E$   | 4                                         |                               | [1]         |
| Mean duration of early infectious stage (subclinical/clinical), days                             | $\mu_1$ | 2.3                                       | -                             | [6]         |
| Shape parameter of negative-binomially-distributed early infectious stage (subclinical/clinical) | $r_1$   | 4                                         |                               | [1]         |
| Mean duration of late infectious stage (subclinical/clinical), days                              | $\mu_2$ | 8                                         | -                             | [6,9,43,44] |
| Shape parameter of negative-binomially-distributed late infectious stage (subclinical/clinical)  | $r_2$   | 4                                         |                               | [1]         |



|                                                                                                   |                    |                                                             |       |                                                           |
|---------------------------------------------------------------------------------------------------|--------------------|-------------------------------------------------------------|-------|-----------------------------------------------------------|
| Relative infectiousness of subclinical infection to clinical infection                            | $h$                | 1                                                           | 0.5–1 | [8,45,46]                                                 |
| Relative infectiousness of early infectious stage to late infectious stage                        | $\alpha$           | 2                                                           | 1–3   | [6,7]                                                     |
| Probability of developing clinical symptoms                                                       | $\rho(a_i)$        | Age-dependent (see Supplementary Table 2)                   | -     | [1]                                                       |
| Mean duration of detectable viral load from start of late infectious stage, days                  |                    | 20                                                          | -     | [6,9–13]                                                  |
| Minimum duration of detectable viral load from start of late infectious stage, days               |                    | 5                                                           | -     | [6,9–13]                                                  |
| Maximum duration of detectable viral load from start of late infectious stage, days               |                    | 37                                                          | -     | [11,13]                                                   |
| Mean time from symptom onset to hospitalization, days                                             |                    | 8                                                           | -     | Assumed same as duration of late infectious stage [24,47] |
| Probability of hospitalization for clinical cases                                                 |                    | Age- and co-morbidity dependent (see Supplementary Table 2) | -     | [4]                                                       |
| Probability of ICU admission among hospitalized cases                                             |                    | 0.261                                                       | -     | [3]                                                       |
| Probability of death for hospitalized cases admitted to ICU                                       |                    | Age- and co-morbidity dependent (see Supplementary Table 2) | -     | [4]                                                       |
| Infection-to-reported-case ratio                                                                  | $\gamma$           | 10                                                          | -     | [27]                                                      |
| Background infection rate in community outside shelter, infections/1,000,000 person-days          | $i_a$              |                                                             |       |                                                           |
| Seattle A                                                                                         |                    | 561                                                         |       | [21]                                                      |
| Seattle B                                                                                         |                    | 543                                                         |       | [21]                                                      |
| Seattle C                                                                                         |                    | 543                                                         |       | [21]                                                      |
| Boston                                                                                            |                    | 2018                                                        |       | [22]                                                      |
| San Francisco                                                                                     |                    | 445                                                         |       | [23]                                                      |
| Relative risk of infection for homeless individuals                                               | $r$                | 2                                                           |       |                                                           |
| Background infection rate in homeless community outside shelter, infections/1,000,000 person-days | $\epsilon = r i_a$ |                                                             |       |                                                           |

*Intervention scenarios*

|                                                                                          |          |                                   |               |                       |
|------------------------------------------------------------------------------------------|----------|-----------------------------------|---------------|-----------------------|
| Simulation duration, days                                                                |          | 30                                |               | Assumed               |
| Number of residents                                                                      |          | 250                               |               | Assumed               |
| Number of staff                                                                          |          | 50                                |               | Assumed               |
| Initial number of infected individuals                                                   |          | 1 (assumed latent)                |               | Assumed               |
| Age- and co-morbidity stratification                                                     |          | Same as for San Francisco shelter |               | Assumed               |
| Basic reproduction number                                                                | $R_0$    |                                   |               |                       |
| “low-risk”                                                                               |          | 1.5                               |               | Assumed               |
| “Seattle”                                                                                |          | 2.9                               |               | Calibrated            |
| “Boston”                                                                                 |          | 3.9                               |               | Calibrated            |
| “San Francisco”                                                                          |          | 6.2                               |               | Calibrated            |
| Infection-to-reported-case ratio                                                         | $\gamma$ | 4                                 |               | [28]                  |
| Background infection rate in community outside shelter, infections/1,000,000 person-days | $i_a$    |                                   | 0–439         |                       |
| No background infection                                                                  |          | 0                                 |               |                       |
| Low                                                                                      |          | 122                               |               | [22]                  |
| Moderate                                                                                 |          | 253                               |               | [21–23]               |
| High                                                                                     |          | 439                               |               | [23]                  |
| Symptom screening                                                                        |          |                                   |               |                       |
| Sensitivity                                                                              |          | 0.4                               | 0.3–0.5       | Assumed based on [48] |
| Specificity                                                                              |          | 0.9                               | 0.8–0.9       | Assumed               |
| Compliance of symptomatic individuals with PCR testing, %                                |          | 80                                | 50–100        | Assumed               |
| PCR testing                                                                              |          |                                   |               |                       |
| Sensitivity                                                                              |          | 0.75                              | 0.6–0.9       | [17–20]               |
| Specificity                                                                              |          | 1                                 | 0.95–1        | [17,20]               |
| Frequency                                                                                |          | Twice weekly                      | Daily–Monthly | [49–51]               |

|                                           |    |        |         |
|-------------------------------------------|----|--------|---------|
| Compliance, %                             | 80 | 50–100 | Assumed |
| Masks                                     |    |        |         |
| Effectiveness (reduction in transmission) | 30 | 10-50  | [52–57] |
| Compliance, %                             | 80 | 50–100 | Assumed |

---

**Supplementary Table 6. Different intervention strategies tested**

| Strategy                                | Interventions           |                                       |                                   |                   |                                     |
|-----------------------------------------|-------------------------|---------------------------------------|-----------------------------------|-------------------|-------------------------------------|
|                                         | Daily symptom screening | Twice-weekly PCR testing of residents | Twice-weekly PCR testing of staff | Universal masking | Relocation of high-risk individuals |
| (1) Symptom screening                   | ✓                       | x                                     | x                                 | x                 | x                                   |
| (2) Routine PCR testing                 | ✓                       | ✓                                     | ✓                                 | x                 | x                                   |
| (3) Universal mask wearing              | ✓                       | x                                     | x                                 | ✓                 | x                                   |
| (4) Relocation of high-risk individuals | ✓                       | x                                     | x                                 | x                 | ✓                                   |
| (5) Routine PCR testing of staff only   | ✓                       | x                                     | ✓                                 | x                 | x                                   |
| (6) Combination strategy                | ✓                       | ✓                                     | ✓                                 | ✓                 | ✓                                   |

**Supplementary Table 7. Estimated epidemiologic parameters based on observed outbreak data from homeless shelters in Seattle, Boston and San Francisco**

| <b>Shelter</b> | <b>Basic reproduction number <math>R_0</math>, median (95% CI)*</b> | <b>Number of latently infected individuals who initially entered shelter <math>E_0</math>, median (95%CI)*</b> | <b>Number of days prior to first reported infection that infected individuals entered shelter † <math>D</math>, median (95% CI)*</b> |
|----------------|---------------------------------------------------------------------|----------------------------------------------------------------------------------------------------------------|--------------------------------------------------------------------------------------------------------------------------------------|
| Seattle A      | 2.9 (1.1–7.3)                                                       | 3 (1–5)                                                                                                        | 16 (9–25)                                                                                                                            |
| Seattle B      | 2.9 (1.1–6.7)                                                       | 3 (1–5)                                                                                                        | 10 (7–14)                                                                                                                            |
| Seattle C      | 3.0 (1.2–7.2)                                                       | 3 (1–5)                                                                                                        | 15 (8–24)                                                                                                                            |
| Boston         | 3.9 (2.2–7.6)                                                       | 3 (1–5)                                                                                                        | 15 (9–23)                                                                                                                            |
| San Francisco  | 6.2 (4.0–7.9)                                                       | 3 (1–5)                                                                                                        | 21 (17–26)                                                                                                                           |

CI = credible interval.

Data was available for three shelters in Seattle (labeled A-C).

\* 95% CIs calculated as 2.5%–97.5% quantile interval of posterior distribution.

†  $D$  is calculated from the estimated time since introduction of infection into the shelter at the end of data collection,  $T$ , as:

$D = \text{date first case identified} - (\text{end date of data collection} - T) + 1$

**Supplementary Table 8. Estimated cumulative infection incidence at the end of the PCR testing period in homeless shelters in Seattle, Boston and San Francisco**

| <b>Shelter</b> | <b>Cumulative infection incidence, median (95% CI)<sup>*</sup>, %</b> |
|----------------|-----------------------------------------------------------------------|
| Seattle A      | 40 (10–81)                                                            |
| Seattle B      | 14 (1–41)                                                             |
| Seattle C      | 37 (12–71)                                                            |
| Boston         | 64 (52–78)                                                            |
| San Francisco  | 83 (72–92)                                                            |

CI = credible interval.

\* 95% CIs calculated as 2.5%–97.5% quantile interval of posterior distribution.

**Supplementary Table 9. Probability of averting an outbreak over a 30-day period in a generalized homeless shelter\* with simulated infection control strategies for different background infection rates in the community outside the shelter**

| Infection control strategy                         | Probability of averting an outbreak |                          |                         |                             |
|----------------------------------------------------|-------------------------------------|--------------------------|-------------------------|-----------------------------|
|                                                    | $R_0 = 1.5$<br>(low-risk)           | $R_0 = 2.9$<br>(Seattle) | $R_0 = 3.9$<br>(Boston) | $R_0 = 6.2$ (San Francisco) |
| Background infection rate = 0                      |                                     |                          |                         |                             |
| (1) Symptom screening                              | 0.61                                | 0.31                     | 0.21                    | 0.12                        |
| (2) Routine twice-weekly PCR testing               | 0.78                                | 0.40                     | 0.28                    | 0.12                        |
| (3) Universal mask wearing                         | 0.73                                | 0.44                     | 0.31                    | 0.16                        |
| (4) Relocation of high-risk individuals            | 0.61                                | 0.31                     | 0.21                    | 0.11                        |
| (5) Routine twice-weekly PCR testing of staff only | 0.67                                | 0.34                     | 0.24                    | 0.13                        |
| (6) Combination strategy                           | 0.86                                | 0.56                     | 0.41                    | 0.20                        |
| Background infection rate = 253/1,000,000/day      |                                     |                          |                         |                             |
| (1) Symptom screening                              | 0.20                                | 0.04                     | 0.02                    | 0.01                        |
| (2) Routine twice-weekly PCR testing               | 0.36                                | 0.14                     | 0.03                    | 0.02                        |
| (3) Universal mask wearing                         | 0.31                                | 0.08                     | 0.04                    | 0.01                        |
| (4) Relocation of high-risk individuals            | 0.19                                | 0.04                     | 0.02                    | 0.01                        |
| (5) Routine twice-weekly PCR testing of staff only | 0.21                                | 0.05                     | 0.02                    | 0.00                        |
| (6) Combination strategy                           | 0.51                                | 0.23                     | 0.09                    | 0.02                        |
| Background infection rate = 439/1,000,000/day      |                                     |                          |                         |                             |
| (1) Symptom screening                              | 0.07                                | 0.01                     | 0.01                    | 0.00                        |
| (2) Routine twice-weekly PCR testing               | 0.22                                | 0.03                     | 0.01                    | 0.00                        |
| (3) Universal mask wearing                         | 0.14                                | 0.02                     | 0.01                    | 0.01                        |
| (4) Relocation of high-risk individuals            | 0.07                                | 0.01                     | 0.01                    | 0.00                        |
| (5) Routine twice-weekly PCR testing of staff only | 0.08                                | 0.01                     | 0.00                    | 0.00                        |
| (6) Combination strategy                           | 0.34                                | 0.08                     | 0.03                    | 0.01                        |

$R_0$  = basic reproduction number.

\* Generalized homeless shelter defined as 250 residents and 50 staff.

**Supplementary Table 10. Reductions in the total number of infections and symptomatic cases over a 30-day period in a generalized homeless shelter\* with simulated infection control strategies for different background infection rates in the community outside the shelter**

| Infection control strategy                    | Median reduction in total infections, % |                          |                         |                                | Median reduction in total symptomatic cases, % |                          |                         |                                |
|-----------------------------------------------|-----------------------------------------|--------------------------|-------------------------|--------------------------------|------------------------------------------------|--------------------------|-------------------------|--------------------------------|
|                                               | $R_0 = 1.5$<br>(low-risk)               | $R_0 = 2.9$<br>(Seattle) | $R_0 = 3.9$<br>(Boston) | $R_0 = 6.2$<br>(San Francisco) | $R_0 = 1.5$<br>(low-risk)                      | $R_0 = 2.9$<br>(Seattle) | $R_0 = 3.9$<br>(Boston) | $R_0 = 6.2$<br>(San Francisco) |
| Background infection rate = 0                 |                                         |                          |                         |                                |                                                |                          |                         |                                |
| (1) Symptom screening                         | 50                                      | 60                       | 41                      | 10                             | 40                                             | 55                       | 43                      | 24                             |
| (2) Routine PCR testing                       | 86                                      | 85                       | 78                      | 38                             | 60                                             | 75                       | 75                      | 53                             |
| (3) Universal mask wearing                    | 75                                      | 87                       | 83                      | 56                             | 59                                             | 77                       | 79                      | 67                             |
| (4) Relocation of high-risk individuals       | 50                                      | 60                       | 40                      | 10                             | 44                                             | 58                       | 48                      | 31                             |
| (5) Routine PCR testing of staff only         | 71                                      | 65                       | 56                      | 17                             | 50                                             | 54                       | 52                      | 35                             |
| (6) Combination strategy                      | 93                                      | 95                       | 94                      | 81                             | 75                                             | 88                       | 90                      | 86                             |
| Background infection rate = 122/1,000,000/day |                                         |                          |                         |                                |                                                |                          |                         |                                |
| (1) Symptom screening                         | 38                                      | 45                       | 40                      | 9                              | 33                                             | 41                       | 42                      | 23                             |
| (2) Routine PCR testing                       | 62                                      | 81                       | 79                      | 37                             | 50                                             | 72                       | 76                      | 50                             |
| (3) Universal mask wearing                    | 55                                      | 75                       | 74                      | 51                             | 49                                             | 67                       | 71                      | 62                             |
| (4) Relocation of high-risk individuals       | 38                                      | 43                       | 38                      | 9                              | 40                                             | 47                       | 48                      | 33                             |
| (5) Routine PCR testing of staff only         | 50                                      | 54                       | 45                      | 13                             | 33                                             | 47                       | 47                      | 28                             |
| (6) Combination strategy                      | 71                                      | 89                       | 90                      | 74                             | 63                                             | 86                       | 89                      | 82                             |
| Background infection rate = 253/1,000,000/day |                                         |                          |                         |                                |                                                |                          |                         |                                |
| (1) Symptom screening                         | 33                                      | 43                       | 31                      | 5                              | 29                                             | 39                       | 32                      | 19                             |
| (2) Routine PCR testing                       | 55                                      | 73                       | 64                      | 24                             | 44                                             | 67                       | 60                      | 42                             |
| (3) Universal mask wearing                    | 53                                      | 71                       | 65                      | 39                             | 44                                             | 63                       | 63                      | 56                             |
| (4) Relocation of high-risk individuals       | 32                                      | 40                       | 30                      | 5                              | 35                                             | 45                       | 40                      | 27                             |
| (5) Routine PCR testing of staff only         | 39                                      | 49                       | 38                      | 7                              | 33                                             | 44                       | 39                      | 21                             |
| (6) Combination strategy                      | 61                                      | 84                       | 82                      | 62                             | 58                                             | 81                       | 80                      | 75                             |
| Background infection rate = 439/1,000,000/day |                                         |                          |                         |                                |                                                |                          |                         |                                |
| (1) Symptom screening                         | 28                                      | 37                       | 25                      | 4                              | 20                                             | 36                       | 30                      | 15                             |
| (2) Routine PCR testing                       | 52                                      | 66                       | 60                      | 20                             | 45                                             | 61                       | 62                      | 42                             |
| (3) Universal mask wearing                    | 45                                      | 65                       | 61                      | 28                             | 38                                             | 60                       | 62                      | 48                             |



|                                         |    |    |    |    |    |    |    |    |
|-----------------------------------------|----|----|----|----|----|----|----|----|
| (4) Relocation of high-risk individuals | 27 | 35 | 24 | 3  | 29 | 42 | 38 | 26 |
| (5) Routine PCR testing of staff only   | 34 | 42 | 33 | 4  | 27 | 39 | 38 | 19 |
| (6) Combination strategy                | 61 | 79 | 81 | 56 | 58 | 76 | 81 | 74 |

$R_0$  = basic reproduction number.

\* Generalized homeless shelter defined as 250 residents and 50 staff.

### Supplementary Table 11. Numbers of PCR tests used under each infection control strategy

| Infection control strategy              | Mean number of tests used per person per month* |
|-----------------------------------------|-------------------------------------------------|
| (1) Symptom screening                   | 2.0                                             |
| (2) Routine PCR testing                 | 6.6                                             |
| (3) Universal mask wearing              | 2.0                                             |
| (4) Relocation of high-risk individuals | 2.0                                             |
| (5) Routine PCR testing of staff only   | 2.8                                             |
| (6) Combination strategy                | 6.6                                             |

\* All strategies use tests as they all include daily symptom screening.

Numbers only shown for  $R_0 = 2.9$  (Seattle), chosen as representative example, and a background infection rate of 122/1,000,000/day as numbers vary little with  $R_0$  and background rate.

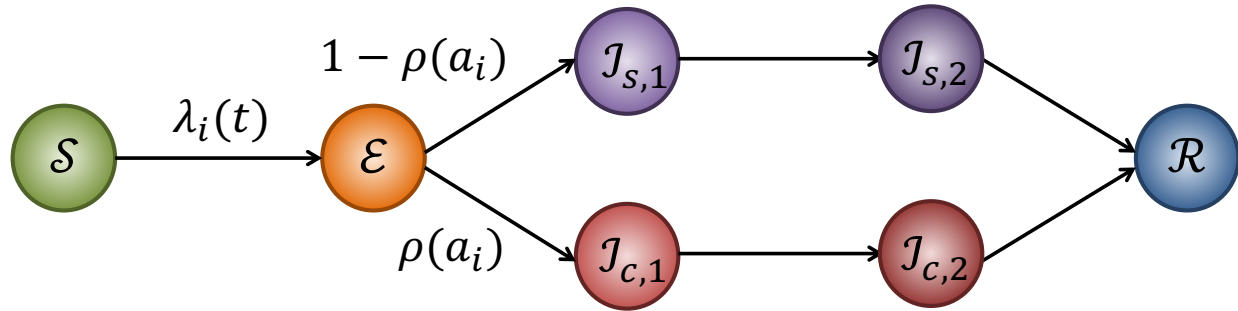

**Supplementary Figure 1. Structure of stochastic individual-level susceptible-exposed-infectious-recovered ( $\mathcal{S}$ - $\mathcal{E}$ - $\mathcal{I}$ - $\mathcal{R}$ ) model of COVID-19 transmission in homeless shelter.** Notation as defined in Supplementary Tables 1 and 5 and Equation (1).

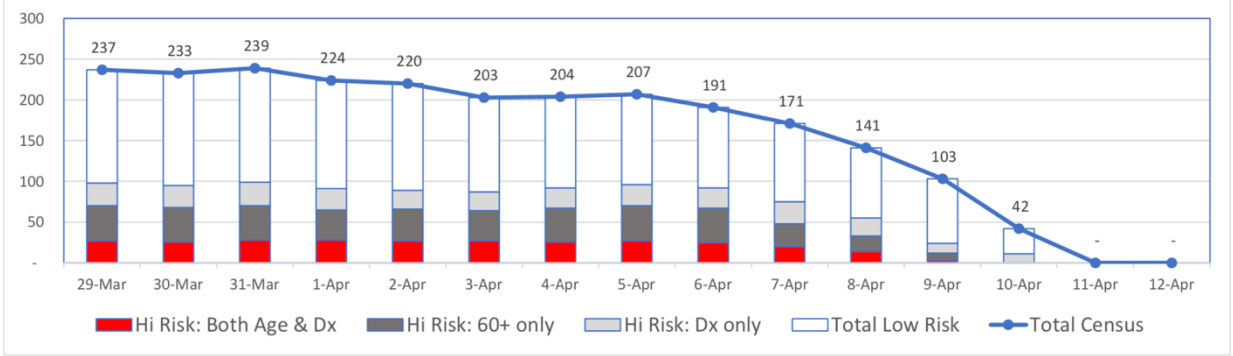

**Supplementary Figure 2. Daily numbers of residents by risk group present in the San Francisco shelter March 29–April 10, 2020. Shelter was disbanded April 11.**

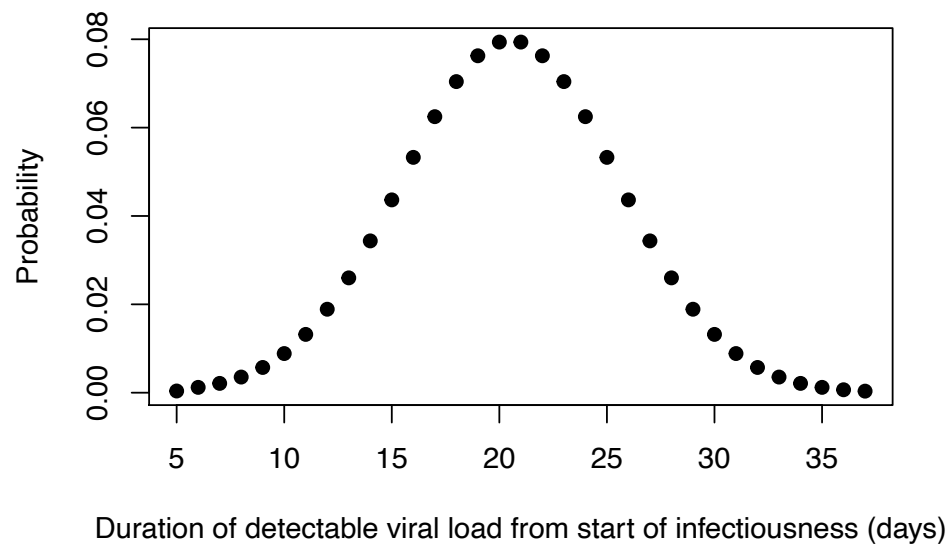

**Supplementary Figure 3. Distribution of duration of detectable viral load from start of late infectious stage**

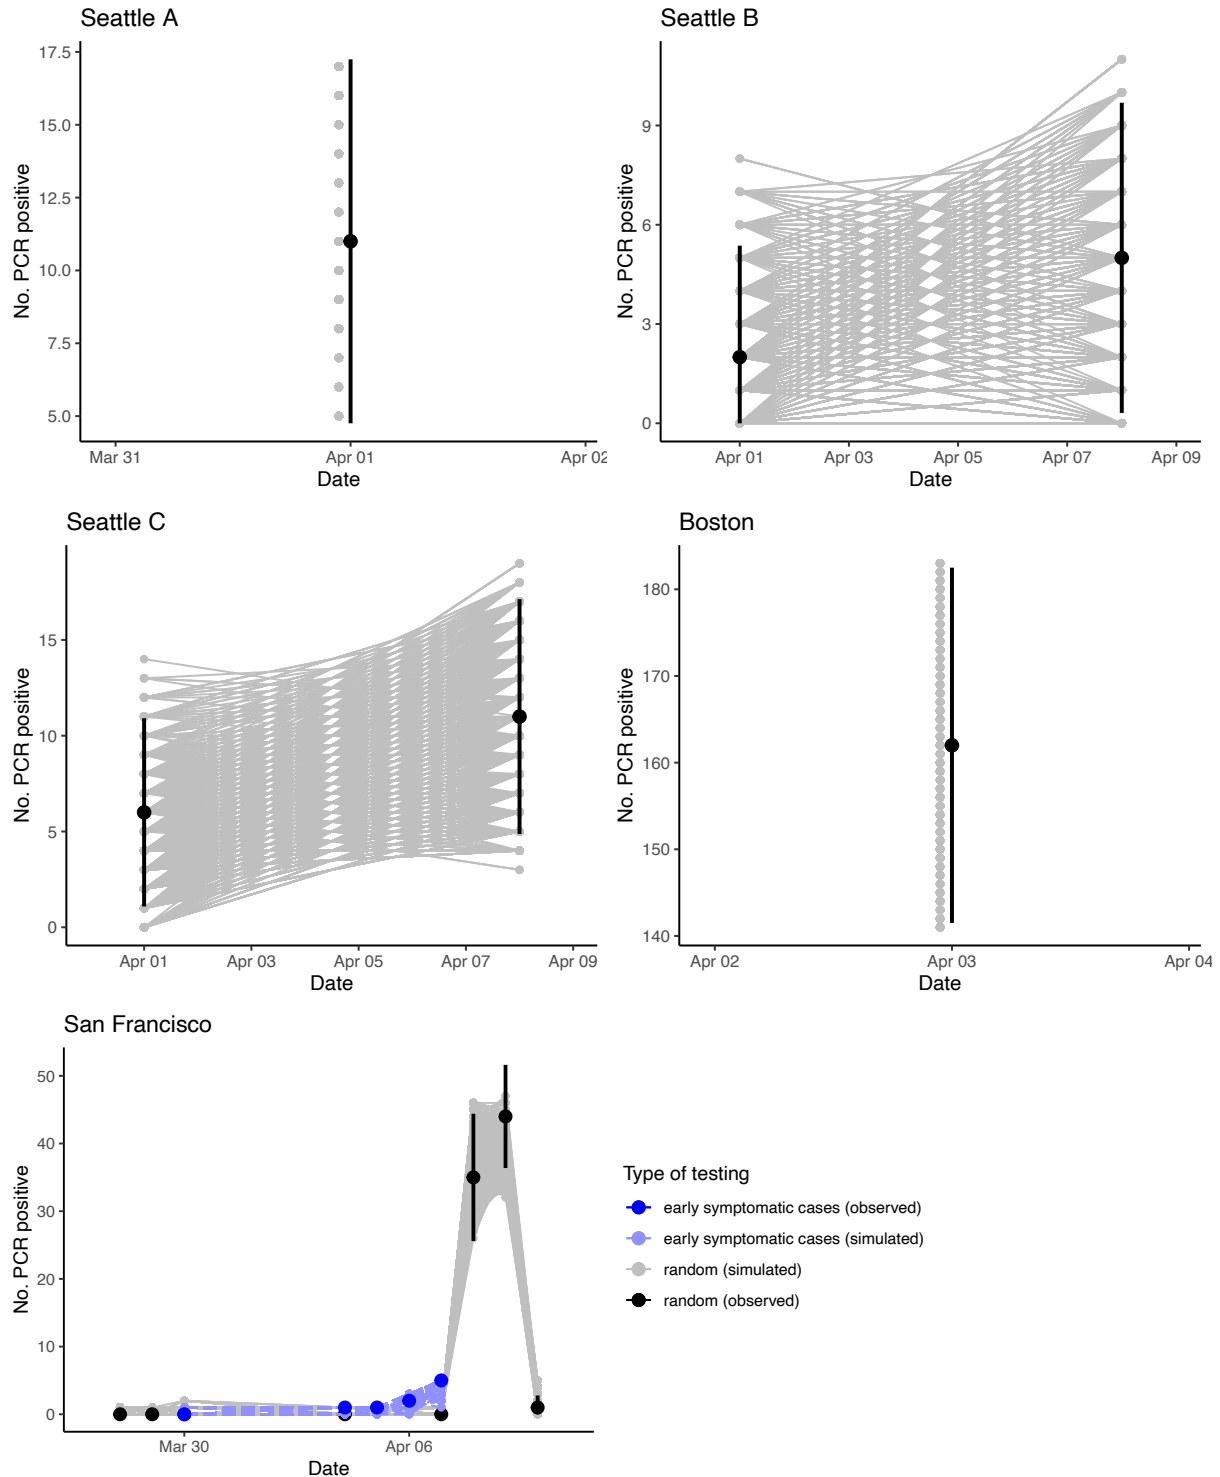

**Supplementary Figure 4. Calibration of microsimulation to observed PCR testing data from outbreaks in homeless shelters in Seattle, Boston and San Francisco.** Data was available for three shelters in Seattle (labeled A-C). Vertical black lines show exact binomial 95% confidence intervals for observed numbers of PCR-positive individuals in random testing.

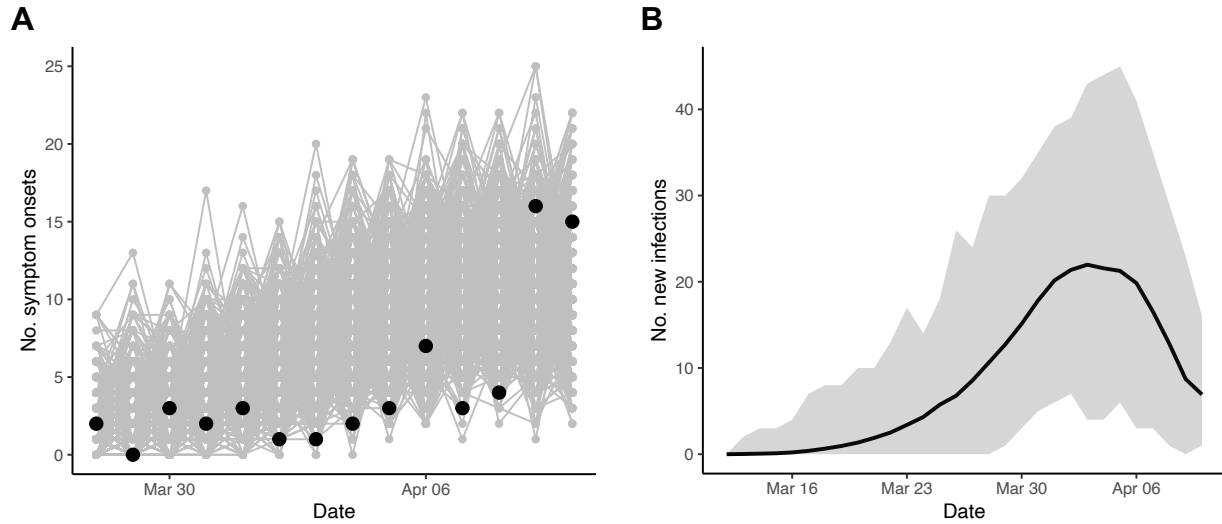

**Supplementary Figure 5. Calibration of microsimulation to additional data from San Francisco shelter outbreak.** (A) Calibration to daily numbers of symptom onsets. Black dots show reported number of symptom onsets, grey lines show simulation output. (B) Estimated daily numbers of new infections over time in 1000 calibrated simulations. Black line and grey shaded region show mean and range respectively across all simulations.

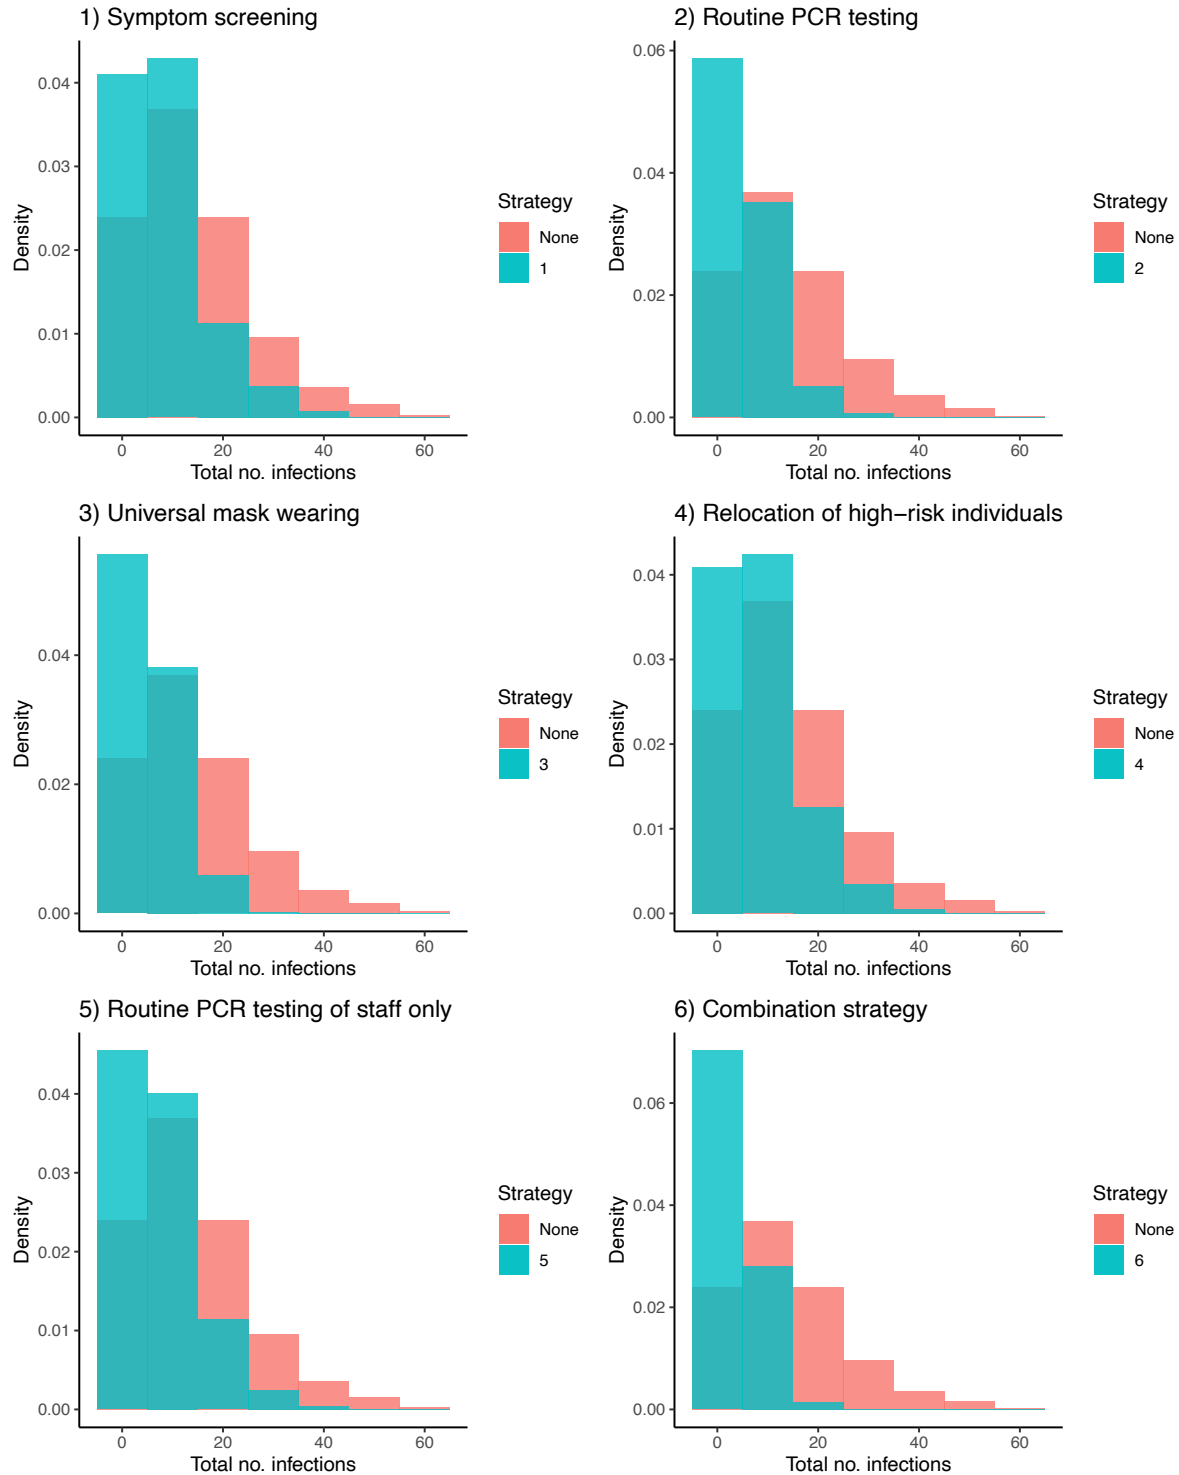

**Supplementary Figure 6. Outbreak size distributions 30 days after introduction of infection in a generalized homeless shelter under different infection control strategies for  $R_0 = 1.5$  (low-risk setting).** Red and green histograms show outbreak size distributions with no interventions and under the intervention strategy respectively. Background infection rate of 122/1,000,000 person-days.



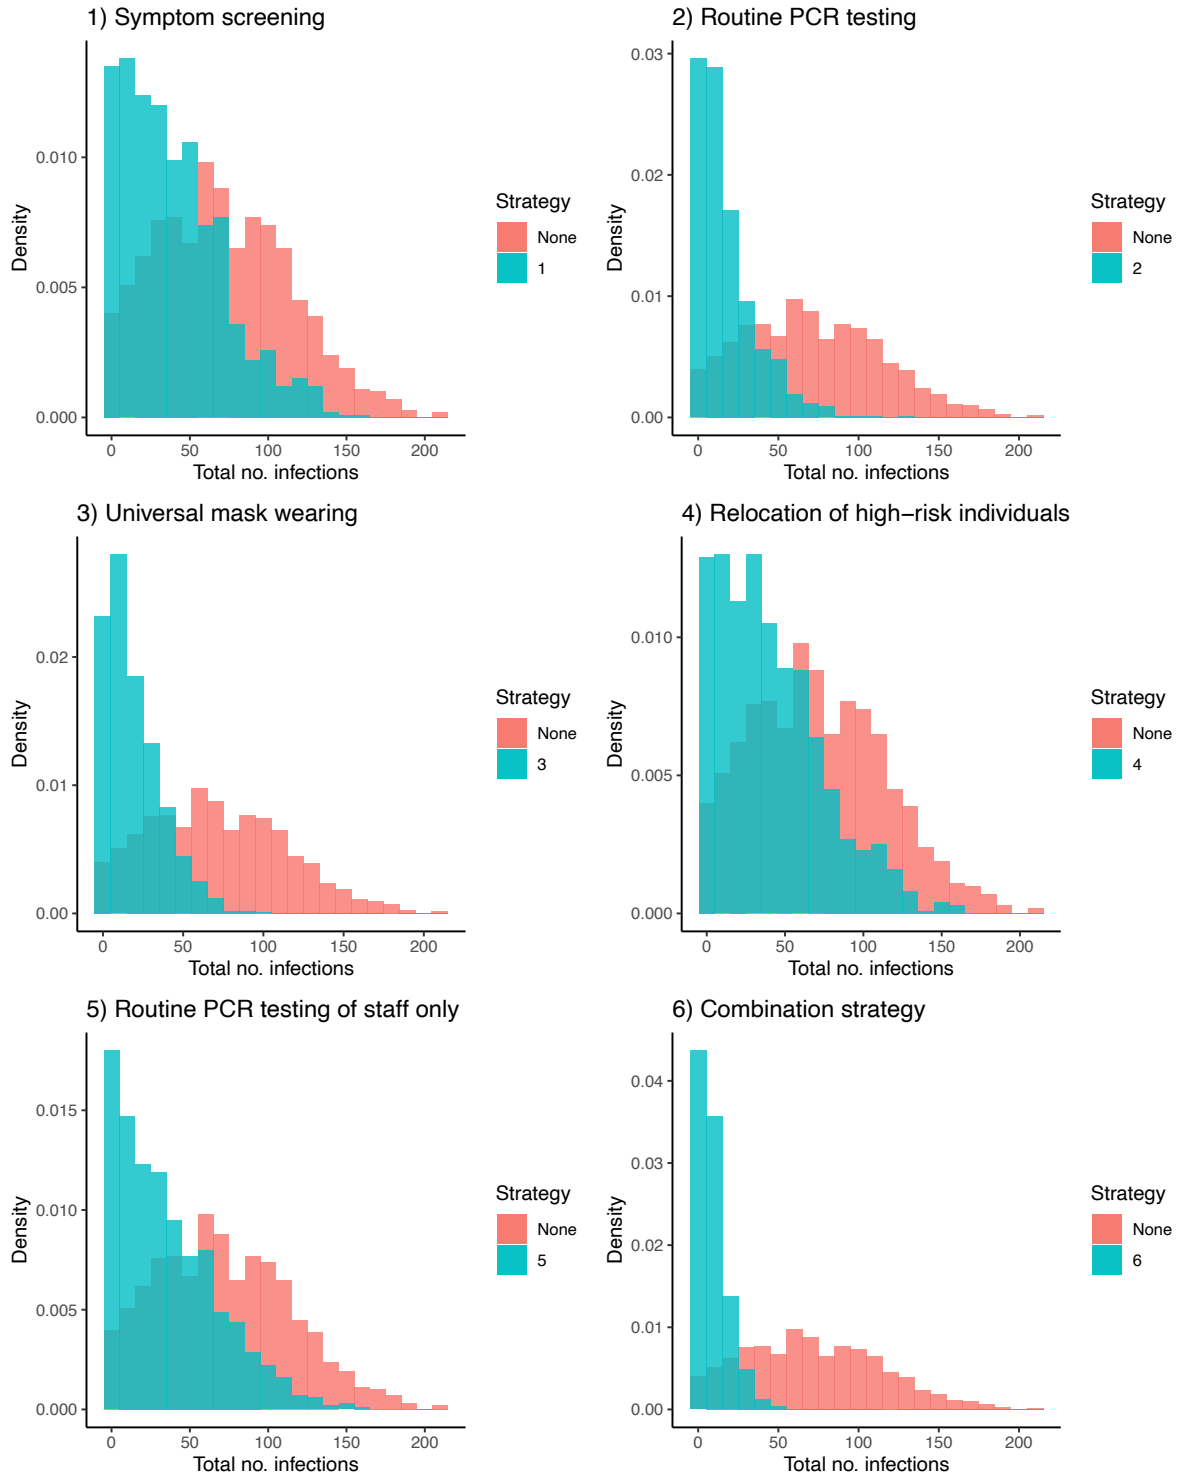

**Supplementary Figure 7. Outbreak size distributions 30 days after introduction of infection in a generalized homeless shelter under different infection control strategies for  $R_0 = 2.9$  (Seattle).** Red and green histograms show outbreak size distributions with no interventions and under the intervention strategy respectively. Background infection rate of 122/1,000,000 person-days.

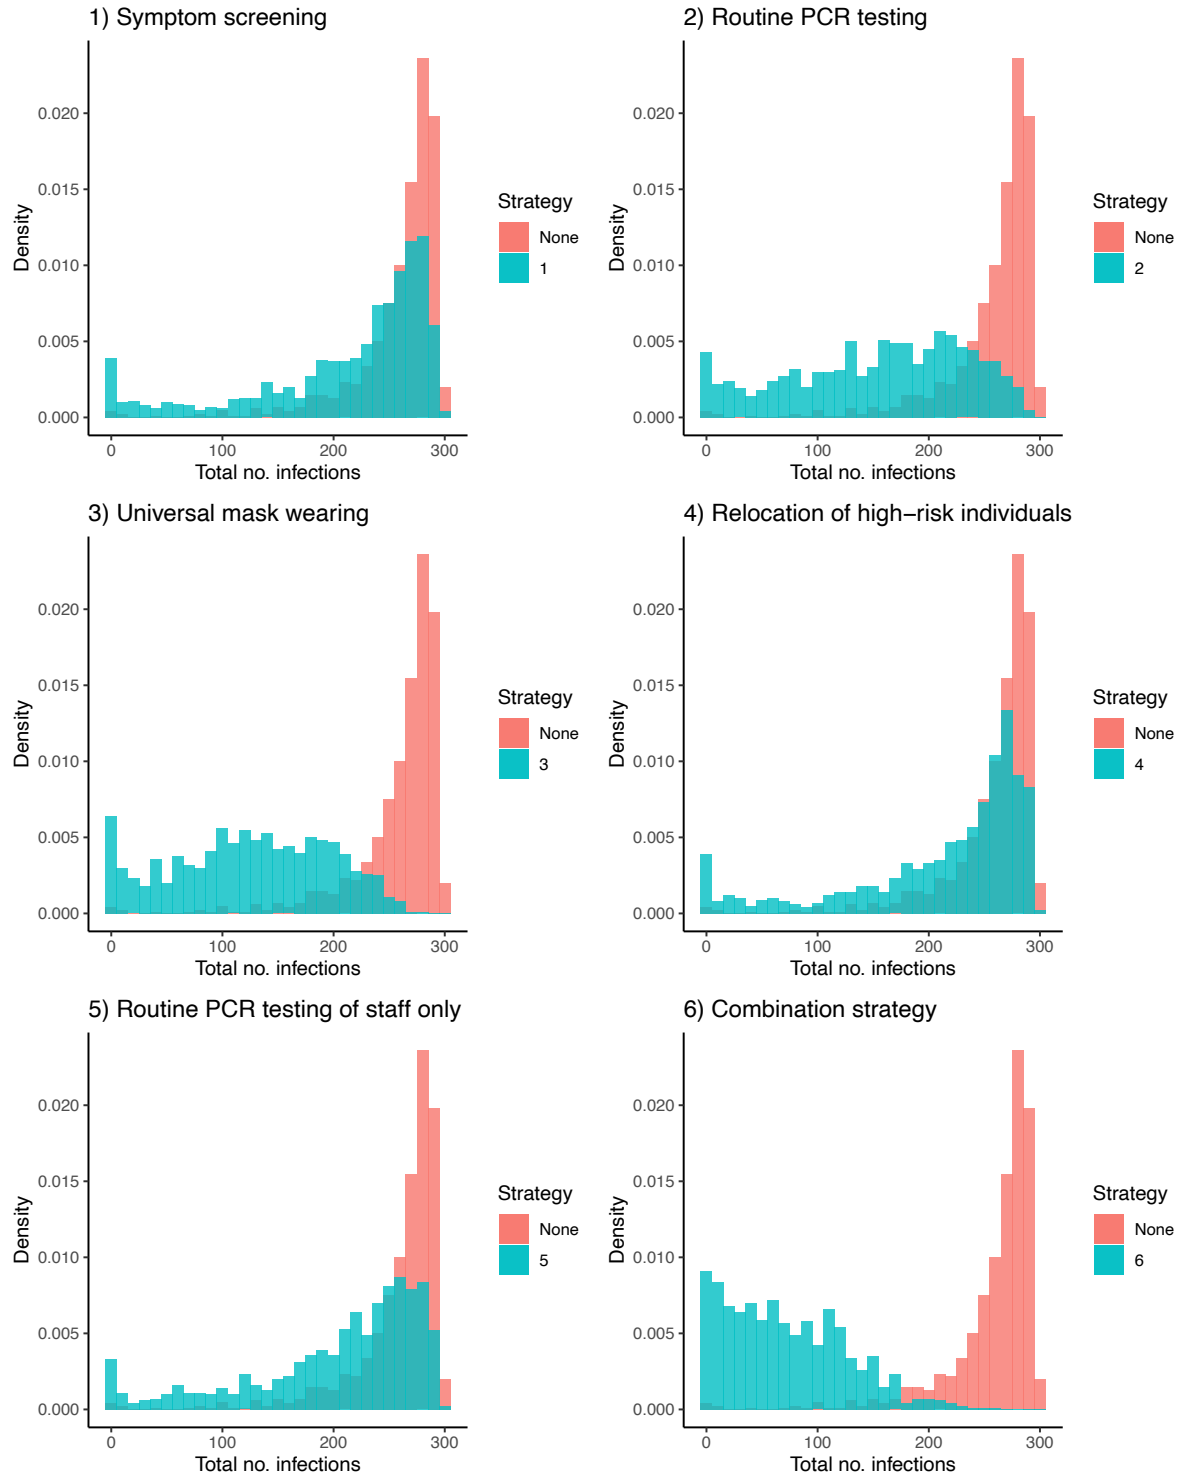

**Supplementary Figure 8. Outbreak size distributions 30 days after introduction of infection in a generalized homeless shelter under different infection control strategies for  $R_0 = 6.2$  (San Francisco).** Red and green histograms show outbreak size distributions with no interventions and under the intervention strategy respectively. Background infection rate of 122/1,000,000 person-days.

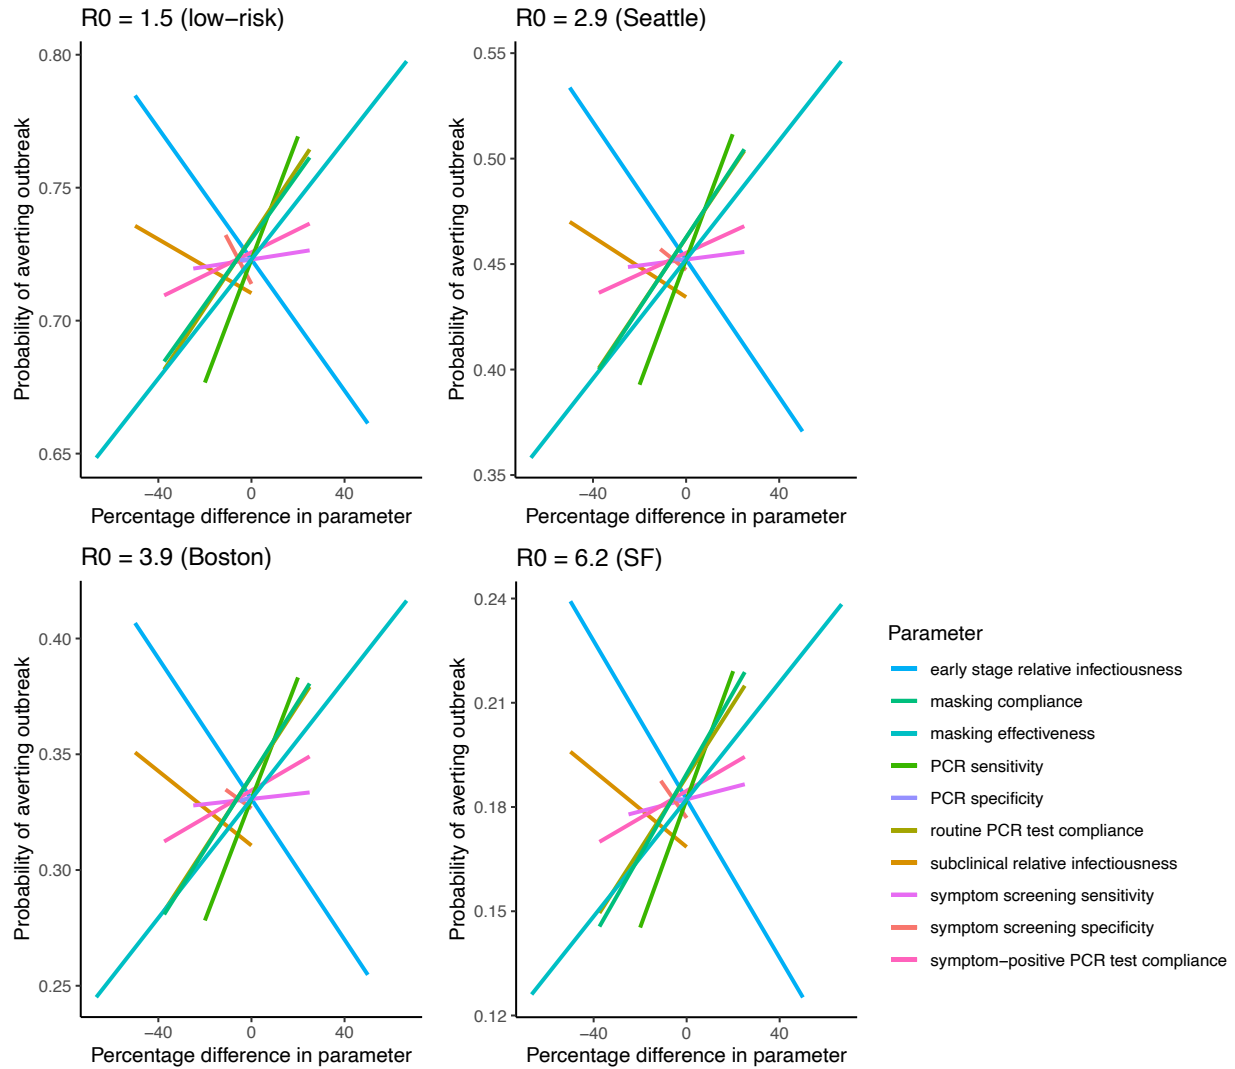

**Supplementary Figure 9. Spider diagrams showing the sensitivity of the estimated probability of averting an outbreak to variation in key natural history and intervention parameters for different  $R_0$  values.** The horizontal axis shows the percentage variation in each parameter relative to its base case value (see Supplementary Table 5). The vertical axis shows the mean probability of averting an outbreak for each parameter across all combinations of the minimums and maximums of the other parameter values.

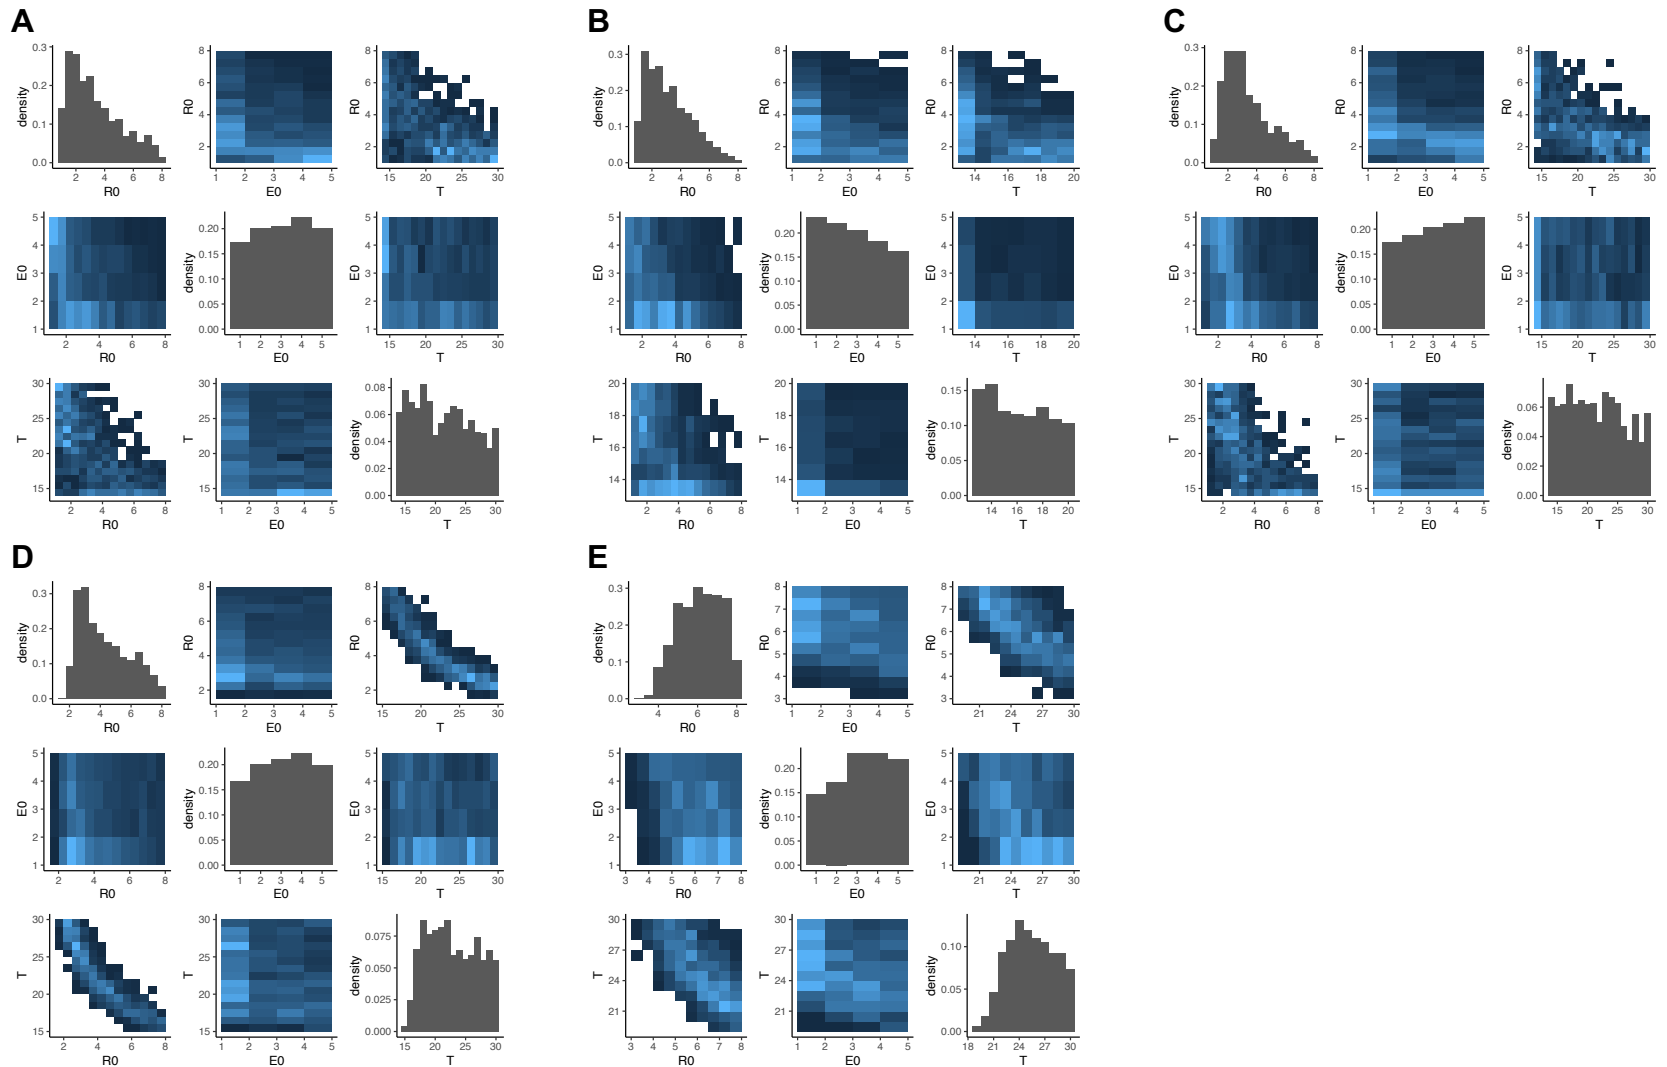

**Supplementary Figure 10. Posterior distributions and pairwise correlation plots for calibrated model parameters –  $R_0$ ,  $E_0$  and  $T$  – for (A)-(C) Seattle shelters A–C, (D) Boston shelter and (E) San Francisco shelter.  $R_0$  = basic reproduction number;  $E_0$  = number of latently infected individuals who initially entered the shelter;  $T$  = number of days before the end of data collection that these individuals entered the shelter.**

## References

1. Davies NG, Klepac P, Liu Y, Prem K, Jit M, Eggo RM. Age-dependent effects in the transmission and control of COVID-19 epidemics. *medRxiv* **2020**;
2. World Health Organization. Transmission of SARS-CoV-2: implications for infection prevention precautions. 2020. Available at: <https://www.who.int/publications/i/item/modes-of-transmission-of-virus-causing-covid-19-implications-for-ipc-precaution-recommendations>. Accessed 11 August 2020.
3. Wang D, Hu B, Hu C, et al. Clinical Characteristics of 138 Hospitalized Patients with 2019 Novel Coronavirus-Infected Pneumonia in Wuhan, China. *JAMA - J Am Med Assoc* **2020**; 323:1061–1069.
4. Tuite AR, Fisman DN, Greer AL. Mathematical modelling of COVID-19 transmission and mitigation strategies in the population of Ontario, Canada. *Cmaj* **2020**; 192:E497–E505.
5. Yang X, Yu Y, Xu J, et al. Clinical course and outcomes of critically ill patients with SARS-CoV-2 pneumonia in Wuhan, China: a single-centered, retrospective, observational study. *Lancet Respir Med* **2020**; 8:475–481. Available at: [http://dx.doi.org/10.1016/S2213-2600\(20\)30079-5](http://dx.doi.org/10.1016/S2213-2600(20)30079-5).
6. He X, Lau EHY, Wu P, et al. Temporal dynamics in viral shedding and transmissibility of COVID-19. *Nat Med* **2020**; 26:672–675.
7. Casey M, Griffin J, McAloon CG, et al. Estimating pre-symptomatic transmission of COVID-19: a secondary analysis using published data. *medRxiv* **2020**; :2020.05.08.20094870. Available at: <http://medrxiv.org/lookup/doi/10.1101/2020.05.08.20094870>.
8. Long QX, Tang XJ, Shi QL, et al. Clinical and immunological assessment of asymptomatic SARS-CoV-2 infections. *Nat Med* **2020**;
9. Wölfel R, Corman VM, Guggemos W, et al. Virological assessment of hospitalized patients with COVID-2019. *Nature* **2020**; 581:465–469.
10. To KKW, Tsang OTY, Leung WS, et al. Temporal profiles of viral load in posterior oropharyngeal saliva samples and serum antibody responses during infection by SARS-CoV-2: an observational cohort study. *Lancet Infect Dis* **2020**; 20:565–574. Available at: [http://dx.doi.org/10.1016/S1473-3099\(20\)30196-1](http://dx.doi.org/10.1016/S1473-3099(20)30196-1).
11. Zhou F, Yu T, Du R, et al. Clinical course and risk factors for mortality of adult inpatients with COVID-19 in Wuhan, China: a retrospective cohort study. *Lancet* **2020**; 395:1054–1062. Available at: [http://dx.doi.org/10.1016/S0140-6736\(20\)30566-3](http://dx.doi.org/10.1016/S0140-6736(20)30566-3).
12. Zou L, Ruan F, Huang M, et al. SARS-CoV-2 viral load in upper respiratory specimens of infected patients. *N Engl J Med* **2020**; 382:1177–1179.
13. Xiao AT, Tong YX, Gao C, Zhu L, Zhang YJ, Zhang S. Dynamic profile of RT-PCR findings from 301 COVID-19 patients in Wuhan, China: A descriptive study. *J Clin Virol* **2020**; 127:0–6.
14. Zhou R, Li F, Chen F, et al. Viral dynamics in asymptomatic patients with COVID-19. *Int J Infect Dis* **2020**; 96:288–290. Available at: <https://doi.org/10.1016/j.ijid.2020.05.030>.
15. Liu Y, Yan LM, Wan L, et al. Viral dynamics in mild and severe cases of COVID-19. *Lancet Infect Dis* **2020**; 20:656–657. Available at: [http://dx.doi.org/10.1016/S1473-3099\(20\)30232-2](http://dx.doi.org/10.1016/S1473-3099(20)30232-2).
16. Heald-Sargent T, Muller WJ, Zheng X, Rippe J, Patel AB, Kociolek LK. Age-Related Differences in Nasopharyngeal Severe Acute Respiratory Syndrome Coronavirus 2

- (SARS-CoV-2) Levels in Patients With Mild to Moderate Coronavirus Disease 2019 (COVID-19) Children. *JAMA - J Am Med Assoc* **2020**; :E1–E2.
17. Kucirka LM, Lauer SA, Laeyendecker O, Boon D, Lessler J. Variation in False-Negative Rate of Reverse Transcriptase Polymerase Chain Reaction–Based SARS-CoV-2 Tests by Time Since Exposure. *Ann Intern Med* **2020**;
  18. Arevalo-Rodriguez I, Buitrago-Garcia D, Simancas-Racines D, et al. False-Negative Results of Initial RT-PCR Assays for Covid-19: a Systematic Review. **2020**; :1–26.
  19. Watson J, Whiting PF, Brush JE. Interpreting a covid-19 test result. *BMJ* **2020**; 369:1–7. Available at: <http://dx.doi.org/doi:10.1136/bmj.m1808>.
  20. Padhye NS. Reconstructed diagnostic sensitivity and specificity of the RT-PCR test for COVID-19. *medRxiv* **2020**; 19:2020.04.24.20078949. Available at: <http://medrxiv.org/lookup/doi/10.1101/2020.04.24.20078949>.
  21. King County Department of Public Health. Daily COVID-19 outbreak summary - King County. 2020. Available at: <https://www.kingcounty.gov/depts/health/covid-19/data/daily-summary.aspx>. Accessed 13 August 2020.
  22. City of Boston. COVID-19 Case Tracker. 2020. Available at: [https://dashboard.cityofboston.gov/t/Guest\\_Access\\_Enabled/views/COVID-19/Dashboard1?:showAppBanner=false&:display\\_count=n&:showVizHome=n&:origin=viz\\_share\\_link&:isGuestRedirectFromVizportal=y&:embed=y](https://dashboard.cityofboston.gov/t/Guest_Access_Enabled/views/COVID-19/Dashboard1?:showAppBanner=false&:display_count=n&:showVizHome=n&:origin=viz_share_link&:isGuestRedirectFromVizportal=y&:embed=y). Accessed 13 August 2020.
  23. San Francisco Department of Public Health. COVID-19 Cases Summarized by Date, Transmission and Case Disposition - City and County of San Francisco. 2020. Available at: <https://data.sfgov.org/COVID-19/COVID-19-Cases-Summarized-by-Date-Transmission-and/tvq9-ec9w>. Accessed 13 August 2020.
  24. MIDAS Network. COVID-19 parameter estimates. Available at: [https://github.com/midas-network/COVID-19/tree/master/parameter\\_estimates/2019\\_novel\\_coronavirus](https://github.com/midas-network/COVID-19/tree/master/parameter_estimates/2019_novel_coronavirus). Accessed 11 August 2020.
  25. Abbott S, Hellewell J, Munday J, Funk S. The transmissibility of novel Coronavirus in the early stages of the 2019-20 outbreak in Wuhan: Exploring initial point-source exposure sizes and durations using scenario analysis. *Wellcome Open Res* **2020**; 5:1–12.
  26. U.S. Census Bureau. U.S. Census Bureau QuickFacts. 2020. Available at: <https://www.census.gov/quickfacts/fact/table/seattlecitywashington,bostoncitymassachusetts,sanfranciscocitycalifornia/PST045219>. Accessed 1 September 2020.
  27. Havers FP, Reed C, Lim T, et al. Seroprevalence of Antibodies to SARS-CoV-2 in 10 Sites in the United States, March 23-May 12, 2020. *JAMA Intern Med* **2020**; 30329:1–11.
  28. Centers for Disease Control. Interactive Serology Dashboard for Commercial Laboratory Surveys. 2020. Available at: <https://www.cdc.gov/coronavirus/2019-ncov/cases-updates/commercial-labs-interactive-serology-dashboard.html>. Accessed 21 August 2020.
  29. Andrews D, Salcedo F, Donahue L, et al. Seattle/King County Point-in-time Count of Persons Experiencing Homelessness. 2019. Available at: [www.allhomekc.orgwww.appliedsurveyresearch.org](http://www.allhomekc.orgwww.appliedsurveyresearch.org). Accessed 20 August 2020.
  30. King County Department of Public Health. Homelessness and COVID-19. 2020. Available at: <https://www.kingcounty.gov/depts/health/covid-19/data/homeless.aspx>. Accessed 21 August 2020.
  31. Tobolowsky FA, Gonzales E. COVID-19 Outbreak Among Three Affiliated Homeless Service Sites — King County, Washington, 2020. *Morb Mortal Wkly Rep* **2020**; 69:523–526.

32. Baggett TP, Keyes H, Sporn N, Gaeta JM. Prevalence of SARS-CoV-2 Infection in Residents of a Large Homeless Shelter in Boston. *JAMA - J Am Med Assoc* **2020**; 323:2191–2192.
33. Minter A, Retkute R. Approximate Bayesian Computation for infectious disease modelling. *Epidemics* **2019**; 29:100368. Available at: <https://doi.org/10.1016/j.epidem.2019.100368>.
34. Toni T, Welch D, Strelkowa N, Ipsen A, Stumpf MPH. Approximate Bayesian computation scheme for parameter inference and model selection in dynamical systems. *J R Soc Interface* **2009**; 6:187–202.
35. Toni T, Stumpf MPH. Simulation-based model selection for dynamical systems in systems and population biology. *Bioinformatics* **2009**; 26:104–110.
36. Lau MS, Grenfell B, Nelson K, Lopman B. Characterizing super-spreading events and age-specific infectivity of COVID-19 transmission in Georgia, USA. *medRxiv* **2020**; :2020.06.20.20130476. Available at: <https://www.medrxiv.org/content/10.1101/2020.06.20.20130476v2%0Ahttps://www.medrxiv.org/content/10.1101/2020.06.20.20130476v2.abstract>.
37. Endo A, Abbott S, Kucharski AJ, Funk S. Estimating the overdispersion in COVID-19 transmission using outbreak sizes outside China. **2020**; :1–13.
38. James A, Eagle L, Phillips C, et al. High COVID-19 Attack Rate Among Attendees at Events at a Church — Arkansas, March 2020. *Morb Mortal Wkly Rep* **2020**; 69:632–635.
39. County S, Hamner L, Dubbel P, et al. High SARS-CoV-2 Attack Rate Following Exposure at a Choir Practice. *Morb Mortal Wkly Rep* **2020**; 69:606–610. Available at: <https://www.cdc.gov/mmwr/volumes/69/wr/mm6919e6.htm>.
40. Szablewski CM, Chang KT, Brown MM, et al. SARS-CoV-2 Transmission and Infection Among Attendees of an Overnight Camp - Georgia, June 2020. *Morb Mortal Wkly Rep* **2020**; 69:1023–1025. Available at: <http://www.ncbi.nlm.nih.gov/pubmed/32759921>.
41. Imbert E, Kinley PM, Scarborough A, et al. Coronavirus Disease 2019 (COVID-19) Outbreak in a San Francisco Homeless Shelter. *Clin Infect Dis* **2020**; Available at: <https://academic.oup.com/cid/advance-article/doi/10.1093/cid/ciaa1071/5879965>. Accessed 21 August 2020.
42. Mosites E, Parker EM, N Clarke KE, et al. Assessment of SARS-CoV-2 Infection Prevalence in Homeless Shelters — Four U.S. Cities, March 27–April 15, 2020. **2019**; 69. Available at: <https://www.medrxiv.org/content/10.1101/2020.04.12.20059618v1>.
43. Bullard J, Dust K, Funk D, et al. Predicting infectious SARS-CoV-2 from diagnostic samples. *Clin Infect Dis* **2020**; Available at: <https://academic.oup.com/cid/advance-article/doi/10.1093/cid/ciaa638/5842165>. Accessed 11 August 2020.
44. Chang D, Mo G, Yuan X, et al. Time Kinetics of Viral Clearance and Resolution of Symptoms in Novel Coronavirus Infection. *Am J Respir Crit Care Med* **2020**; 201:1150–1152.
45. Li R, Pei S, Chen B, et al. Substantial undocumented infection facilitates the rapid dissemination of novel coronavirus (SARS-CoV-2). *Science* (80- ) **2020**; 368:489–493.
46. Chen Y, Wang A, Yi B, et al. Epidemiological characteristics of infection in COVID-19 close contacts in Ningbo city. *Chinese J Epidemiol* **2020**; 41:667–671.
47. Centers for Disease Control. COVID-19 Pandemic Planning Scenarios. 2020. Available at: <https://www.cdc.gov/coronavirus/2019-ncov/hcp/planning-scenarios.html>. Accessed 21 August 2020.

48. Gostic KM, Gomez ACR, Mummah RO, Kucharski AJ, Lloyd-Smith JO. Estimated effectiveness of symptom and risk screening to prevent the spread of COVID-19. *Elife* **2020**; 9:1–18.
49. Larremore DB, Wilder B, Lester E, et al. Test sensitivity is secondary to frequency and turnaround time for COVID-19 surveillance. *medRxiv* **2020**; :2020.06.22.20136309. Available at: <https://www.medrxiv.org/content/10.1101/2020.06.22.20136309v2%0Ahttps://www.medrxiv.org/content/10.1101/2020.06.22.20136309v2.abstract>.
50. Paltiel AD, Zheng A, Walensky RP. Assessment of SARS-CoV-2 Screening Strategies to Permit the Safe Reopening of College Campuses in the United States. *JAMA Netw Open* **2020**; 3:e2016818. Available at: <http://www.ncbi.nlm.nih.gov/pubmed/32735339>.
51. Chin ET, Huynh BQ, Murrill M, Basu S, Lo NC. Frequency of routine testing for COVID-19 in high-risk environments to reduce workplace outbreaks. *medRxiv* **2020**; :2020.04.30.20087015. Available at: <http://medrxiv.org/content/early/2020/06/22/2020.04.30.20087015.abstract>.
52. Leung NHL, Chu DKW, Shiu EYC, et al. Respiratory virus shedding in exhaled breath and efficacy of face masks. *Nat Med* **2020**; 26:676–680. Available at: <http://dx.doi.org/10.1038/s41591-020-0843-2>.
53. MacIntyre CR, Chughtai AA. Facemasks for the prevention of infection in healthcare and community settings. *BMJ* **2015**; 350:1–12.
54. MacIntyre CR, Chughtai AA. A rapid systematic review of the efficacy of face masks and respirators against coronaviruses and other respiratory transmissible viruses for the community, healthcare workers and sick patients. *Int J Nurs Stud* **2020**; 108:0–5.
55. Brainard JS, Jones N, Lake I, Hooper L, Hunter P. Facemasks and similar barriers to prevent respiratory illness such as COVID-19: A rapid systematic review. **2020**;
56. Chan JF-WW, Yuan S, Zhang AJ, et al. Surgical mask partition reduces the risk of non-contact transmission in a golden Syrian hamster model for Coronavirus Disease 2019 (COVID-19). *Clin Infect Dis* **2020**; Available at: <https://academic.oup.com/cid/advance-article/doi/10.1093/cid/ciaa644/5848814>. Accessed 11 August 2020.
57. Mueller A, Eden M, Oakes J, Bellini C, Fernandez L. Quantitative Method for Comparative Assessment of Particle Removal Efficiency of Fabric Masks as Alternatives to Standard Surgical Masks for PPE. *Matter* **2020**; Available at: <https://doi.org/10.1016/j.matt.2020.07.006>.
